# Supplementary material
Source: ML conference proceedings conference paper supplement (https://proceedings.mlr.press/v97/clarkson19a.html)
Supplement: Supplementary file [file clarkson19a-supp.pdf]

## Supplementary Material for “Dimensionality Reduction for Tukey Regression”

**A. Preliminaries**

For two real numbers  $a$  and  $b$ , we use the notation  $a = (1 \pm \varepsilon)b$  if  $a \in [(1 - \varepsilon)b, (1 + \varepsilon)b]$ .

We use  $\|\cdot\|_p$  to denote the  $\ell_p$  norm of a vector, and  $\|\cdot\|_{p,w}$  to denote the weighted  $\ell_p$  norm, i.e.,

$$\|y\|_{p,w} = \left( \sum_{i=1}^n w_i |y_i|^p \right)^{1/p}.$$

For a vector  $y \in \mathbb{R}^n$ , a weight vector  $w \in \mathbb{R}^n$  whose entries are all non-negative and a loss function  $M : \mathbb{R} \rightarrow \mathbb{R}^+$  that satisfies Assumption 1,  $\|y\|_{M,w}$  is defined to be

$$\|y\|_{M,w} = \sum_{i=1}^n w_i \cdot M(y_i).$$

We also define  $\|y\|_M$  to be

$$\|y\|_M = \sum_{i=1}^n M(y_i).$$

For a vector  $y \in \mathbb{R}^n$  and a real number  $\tau \geq 0$ , we define  $H_y$  to be the set  $H_y = \{i \in [n] \mid |y_i| > \tau\}$ , and  $L_y$  to be the set  $L_y = \{i \in [n] \mid |y_i| \leq \tau\}$ .

**A.1. Tail Inequalities**

**Lemma A.1** (Bernstein’s inequality). *Suppose  $X_1, X_2, \dots, X_n$  are independent random variables taking values in  $[-b, b]$ . Let  $X = \sum_{i=1}^n X_i$  and  $\text{Var}[X] = \sum_{i=1}^n \text{Var}[X_i]$  be the variance of  $X$ . For any  $t > 0$  we have*

$$\Pr[|X - \mathbb{E}[X]| > t] \leq 2 \exp\left(-\frac{t^2}{2 \text{Var}[X] + 2bt/3}\right).$$

**A.2. Facts Regarding the Loss Function**

**Lemma A.2.** *Under Assumption 1, there is a constant  $C > 0$  that depends only on  $p$ , for which for any  $a, b$  with  $|b| \leq \varepsilon|a|$ , we have  $M(a + b) = (1 \pm C\varepsilon)M(a)$ .*

*Proof.* Without loss of generality we assume  $a > 0$ . When  $b \geq 0$ , by Assumption 1.3, we have

$$M(a) \leq M(a + b) \leq (1 + \varepsilon)^p \cdot M(a) \leq (1 + C\varepsilon)M(a).$$

When  $b < 0$ , we have

$$M(a) \geq M(a + b) \geq \left(\frac{a}{a + b}\right)^p M(a) \geq (1 - C\varepsilon)M(a).$$

□

**Lemma A.3.** *Under Assumption 1, there is a constant  $C' > 0$  that depends only on  $p$ , for which for any  $e, y \in \mathbb{R}^n$  and any weight vector  $w$  with  $\|e\|_{M,w} \leq \varepsilon^{2p+1}\|y\|_{M,w}$ ,*

$$\|y + e\|_{M,w} = (1 \pm C'\varepsilon)\|y\|_{M,w}.$$

*Proof.* Clearly, by Assumption 1.3,

$$\|e/\varepsilon^2\|_{M,w} \leq \varepsilon^{-2p}\|e\|_{M,w} \leq \varepsilon\|y\|_{M,w}.$$

Let  $S = \{i \in [n] \mid |e_i| \leq \varepsilon |y_i|\}$ . By Lemma A.2, for all  $i \in S$  we have  $M(y_i + e_i) = (1 \pm C\varepsilon)M(y_i)$ . For all  $i \in [n] \setminus S$ , we have  $|e_i| > \varepsilon |y_i|$ . For sufficiently small  $\varepsilon$ , by Assumption 1.2 and Lemma A.2,

$$M(e_i + y_i) \leq M(e_i/\varepsilon^2 + y_i) \leq (1 + C\varepsilon)M(e_i/\varepsilon^2),$$

which implies

$$\sum_{i \in [n] \setminus S} w_i M(y_i + e_i) \leq (1 + C\varepsilon) \|e/\varepsilon^2\|_{M,w} \leq (1 + C\varepsilon) \varepsilon \|y\|_{M,w}.$$

Furthermore,

$$\sum_{i \in [n] \setminus S} w_i M(y_i) \leq \sum_{i \in [n] \setminus S} w_i M(e_i/\varepsilon) \leq \|e/\varepsilon\|_{M,w} \leq \varepsilon \|y\|_{M,w}.$$

Thus,

$$\begin{aligned} & \|y + e\|_{M,w} \\ &= \sum_{i \in S} w_i M(y_i + e_i) + \sum_{i \in [n] \setminus S} w_i M(y_i + e_i) \\ &= (1 \pm C\varepsilon) \sum_{i \in S} w_i M(y_i) \pm (1 + C\varepsilon) \varepsilon \|y\|_{M,w} \\ &= (1 \pm C'\varepsilon) \|y\|_{M,w}. \end{aligned}$$

□

### A.3. Facts Regarding Lewis Weights

In this section we recall some facts regarding leverage scores and Lewis weights.

**Definition A.1.** Given a matrix  $A \in \mathbb{R}^{n \times d}$ . The *leverage score* of a row  $A_{i,*}$  is defined to be

$$\tau_i(A) = A_{i,*} (A^T A)^\dagger (A_{i,*})^T.$$

**Definition A.2** ((Cohen & Peng, 2015)). For a matrix  $A \in \mathbb{R}^{n \times d}$ , its  $\ell_p$  *Lewis weights*  $\{u_i\}_{i=1}^n$  are the *unique weights* such that for each  $i \in [n]$  we have

$$u_i = \tau_i(U^{1/2-1/p} A).$$

Here  $\tau_i$  is the leverage score of the  $i$ -th row of a matrix and  $U$  is the diagonal matrix formed by putting the elements of  $u$  on the diagonal.

**Theorem A.4** ((Cohen & Peng, 2015)). *There is an algorithm that receives a matrix  $A \in \mathbb{R}^{n \times d}$  and outputs  $\{\hat{u}\}_{i=1}^n$  such that*

$$u_i \leq \hat{u}_i \leq 2u_i,$$

where  $\{u_i\}_{i=1}^n$  are the  $\ell_p$  Lewis weights of  $A$ . Furthermore, the algorithm runs in  $\tilde{O}(\text{mnz}(A) + d^{p/2+O(1)})$  time.

**Theorem A.5** (Lewis's change of density (Lewis, 1978), see also (Wojtaszczyk, 1996, p. 113)). *Given a matrix  $A \in \mathbb{R}^{n \times d}$  and  $p \geq 1$ , there exists a basis matrix  $H \in \mathbb{R}^{n \times d}$  of the column space of  $A$ , such that if we define a weight vector  $\bar{u} \in \mathbb{R}^n$  where  $\bar{u}_i = \|H_{i,*}\|_2$ , then the following hold:*

1.  $\|\bar{u}\|_p^p \leq d$ ;
2.  $\bar{U}^{p/2-1} H$  is an orthonormal matrix.

Here  $\bar{U}$  is the diagonal matrix formed by putting the elements of  $\bar{u}$  on the diagonal.

**Lemma A.6** (See, e.g., (Wojtaszczyk, 1996, p. 115)). *Given a matrix  $A \in \mathbb{R}^{n \times d}$ , for the basis matrix  $H$  and the weight vector  $\bar{u}$  defined in Theorem A.5, for all  $x \in \mathbb{R}^d$  we have*

$$\|\bar{U}^{p/2-1} Hx\|_2 \leq \|Hx\|_p \leq d^{1/p-1/2} \|\bar{U}^{p/2-1} Hx\|_2$$

when  $1 \leq p \leq 2$ , and

$$\|Hx\|_p \leq \|\bar{U}^{p/2-1} Hx\|_2 \leq d^{1/2-1/p} \|Hx\|_p$$

when  $p \geq 2$ .

Since  $\bar{U}^{p/2-1} H$  is an orthonormal matrix, for all  $x \in \mathbb{R}^d$  we have

$$\|x\|_2 \leq \|Hx\|_p \leq d^{1/p-1/2} \|x\|_2$$

when  $1 \leq p \leq 2$ , and

$$\|Hx\|_p \leq \|x\|_2 \leq d^{1/2-1/p} \|Hx\|_p$$

when  $p \geq 2$ .

**Lemma A.7.** Given a matrix  $A \in \mathbb{R}^{n \times d}$  and  $p \geq 1$ , the weight vector  $u$  defined in Definition A.2 and the weight vector  $\bar{u}$  defined in Theorem A.5 satisfies

$$u_i = \bar{u}_i^p.$$

*Proof.* We show that substituting  $u_i = \bar{u}_i^p$  will satisfy

$$u_i = \tau_i(U^{1/2-1/p} A),$$

and thus the theorem follows by the uniqueness of Lewis weights.

Since leverage scores are invariant under change of basis (see, e.g., (Woodruff, 2014, p. 30)), we have

$$\tau_i(U^{1/2-1/p} A) = \tau_i(U^{1/2-1/p} H),$$

where  $H$  is the basis matrix defined in Theorem A.5. Substituting  $u_i = \bar{u}_i^p$  we have

$$\tau_i(U^{1/2-1/p} A) = \tau_i(\bar{U}^{p/2-1} H).$$

However, since  $\bar{U}^{p/2-1} H$  is an orthonormal matrix, and the leverage scores of an orthonormal matrix are just squared  $\ell_2$  norm of rows (see, e.g., (Woodruff, 2014, p. 29)), we have

$$\tau_i(U^{1/2-1/p} A) = \left( \bar{u}_i^{p/2-1} \|H_{i,*}\|_2 \right)^2 = \bar{u}_i^p.$$

□

**Lemma A.8.** Given a matrix  $A \in \mathbb{R}^{n \times d}$  and  $p \geq 1$ , for all  $y \in \mathbf{im}(A)$  and  $i \in [n]$ , we have

$$|y_i|^p \leq d^{\max\{0, p/2-1\}} u_i \cdot \|y\|_p^p.$$

Here  $\{u_i\}_{i=1}^n$  are the  $\ell_p$  Lewis weights defined in Definition A.2.

*Proof.* For all  $y \in \mathbf{im}(A)$ , we can write  $y = Hx$  for some vector  $x \in \mathbb{R}$  and the basis matrix  $H$  in Theorem A.5. By the Cauchy-Schwarz inequality,

$$|y_i|^p = |\langle x, H_{i,*} \rangle|^p \leq \|x\|_2^p \cdot \|H_{i,*}\|_2^p,$$

which implies

$$|y_i|^p \leq d^{\max\{0, p/2-1\}} \cdot \|y\|_p^p \cdot \|H_{i,*}\|_2^p$$

by Lemma A.6, which again implies

$$|y_i|^p \leq d^{\max\{0, p/2-1\}} u_i \cdot \|y\|_p^p$$

since  $\bar{u}_i = \|H_{i,*}\|_2$  and  $u_i = \bar{u}_i^p$  by Lemma A.7.

□

**Lemma A.9.** Under Assumption 1, given a matrix  $A \in \mathbb{R}^{n \times d}$ ,  $\delta_{\text{lewis}} \in (0, 1)$ , and a weight vector  $w \in \mathbb{R}^n$  such that (i)  $w_i \geq 1$  for all  $i \in [n]$  and (ii)  $\max_{i \in [n]} w_i \leq 2 \min_{i \in [n]} w_i$ . Let  $w' \in \mathbb{R}^n$  be another weight vector which is defined to be

$$w'_i = \begin{cases} w_i/p_i & \text{with probability } p_i \\ 0 & \text{with probability } 1 - p_i \end{cases}$$

and  $p_i$  satisfies

$$p_i \geq \min\{1, \Theta(U_M/L_M \cdot d^{\max\{0, p/2-1\}} u_i \cdot \log(1/\delta_{\text{lewis}})/\varepsilon^2)\},$$

then for any fixed vectors  $x \in \mathbb{R}^d$  such that  $\|Ax\|_\infty \leq \tau$ , with probability at least  $1 - \delta_{\text{lewis}}$  we have

$$\|Ax\|_{M,w} = (1 \pm \varepsilon) \|Ax\|_{M,w'}.$$

*Proof.* Without loss of generality we assume  $1 \leq w_i \leq 2$  for all  $i \in [n]$ . Let  $y = Ax$ . We use the random variable  $Z_i$  to denote

$$Z_i = w'_i M(y_i).$$

Clearly  $\mathbb{E}[Z_i] = w_i M(y_i)$ , which implies

$$\mathbb{E}[\|y\|_{M,w'}] = \|y\|_{M,w}.$$

Furthermore,  $Z_i \leq 2M(y_i)/p_i$ . Since  $\|y\|_\infty \leq \tau$  and  $L_M |y_i|^p \leq M(y_i) \leq U_M |y_i|^p$  when  $|y_i| \leq \tau$ , by Lemma A.8 we have

$$Z_i \leq 2U_M |y_i|^p / p_i \leq \Theta(L_M \cdot \|y\|_p^p \cdot \varepsilon^2 / \log(1/\delta_{\text{lewis}})) \leq \Theta(\|y\|_{M,w} \cdot \varepsilon^2 / \log(1/\delta_{\text{lewis}})).$$

Moreover,  $\mathbb{E}[Z_i^2] \leq O((M(y_i))^2/p_i)$ , which implies

$$\sum_{i=1}^n \mathbb{E}[Z_i^2] \leq O\left(\sum_{i=1}^n (M(y_i))^2/p_i\right).$$

By Hölder's inequality,

$$\sum_{i=1}^n \mathbb{E}[Z_i^2] \leq O(\|y\|_M) \cdot \max_{i \in [n]} M(y_i)/p_i \leq O(\|y\|_{M,w}^2 \cdot \varepsilon^2 / \log(1/\delta_{\text{lewis}})).$$

Furthermore, since

$$\text{Var}\left[\sum_{i=1}^n Z_i\right] = \sum_{i=1}^n \text{Var}[Z_i] \leq \sum_{i=1}^n \mathbb{E}[Z_i^2],$$

Bernstein's inequality in Lemma A.1 implies

$$\Pr[\|\|y\|_{M,w'} - \|y\|_{M,w}\| > t] \leq \exp\left(-\Theta\left(\frac{t^2}{\|y\|_{M,w} \cdot \varepsilon^2 / \log(1/\delta_{\text{lewis}}) \cdot t + \|y\|_{M,w}^2 \cdot \varepsilon^2 / \log(1/\delta_{\text{lewis}})}\right)\right).$$

Taking  $t = \varepsilon \cdot \|y\|_{M,w}$  implies the desired result.  $\square$

**Theorem A.10.** Given a matrix  $A \in \mathbb{R}^{n \times d}$ ,  $\delta_{\text{subspace}} \in (0, 1)$ , and a weight vector  $w \in \mathbb{R}^n$  such that (i)  $w_i \geq 1$  for all  $i \in [n]$  and (ii)  $\max_{i \in [n]} w_i \leq 2 \min_{i \in [n]} w_i$ . Let  $w' \in \mathbb{R}^n$  be another weight vector which is defined to be

$$w'_i = \begin{cases} w_i/p_i & \text{with probability } p_i \\ 0 & \text{with probability } 1 - p_i \end{cases}$$

and  $p_i$  satisfies

$$p_i \geq \min\{1, \Theta(d^{\max\{0, p/2-1\}} u_i \cdot (d \log(1/\varepsilon) + \log(1/\delta_{\text{subspace}})) / \varepsilon^2)\},$$

then with probability at least  $1 - \delta_{\text{subspace}}$ , for all vectors  $x \in \mathbb{R}^d$ , we have

$$\|Ax\|_{p,w}^p = (1 \pm \varepsilon) \|Ax\|_{p,w'}^p.$$

*Proof.* Let  $\mathcal{N}$  be an  $\varepsilon$ -net for  $\{Ax \mid \|Ax\|_{p,w} = 1\}$ . Standard facts (see, e.g., (Woodruff, 2014, p. 48)) imply that  $\log |\mathcal{N}| \leq O(d \log(1/\varepsilon))$ . Now we invoke Lemma A.9 with  $\delta_{\text{lewis}} = \delta_{\text{subspace}}/|\mathcal{N}|$ . Notice that  $f(x) = |x|^p$  is also a loss function that satisfies Assumption 1, with  $L_M = U_M = 1$  and  $\tau = \infty$ . Thus, if  $p_i$  satisfies

$$p_i \geq \Theta(d^{\max\{0, p/2-1\}} u_i \cdot (d \log(1/\varepsilon) + \log(1/\delta_{\text{subspace}}))/\varepsilon^2),$$

then with probability  $1 - \delta_{\text{subspace}}$ , simultaneously for all  $x \in \mathcal{N}$  we have

$$\|Ax\|_{p,w}^p = (1 \pm \varepsilon) \|Ax\|_{p,w'}^p.$$

Now we can invoke the standard successive approximation argument (see, e.g., (Woodruff, 2014, p. 47)) to show that with probability  $1 - \delta_{\text{subspace}}$ , simultaneously for all  $x \in \mathbb{R}^d$  we have

$$\|Ax\|_{p,w}^p = (1 \pm O(\varepsilon)) \|Ax\|_{p,w'}^p.$$

Adjusting constants implies the desired result. □

## B. Finding Heavy Coordinates

### B.1. A Polynomial Time Algorithm

1. Let  $J = \emptyset$ .
2. Repeat the following for  $\alpha$  times:
  - (a) Calculate  $\{u_i\}_{i \in [n] \setminus J}$ , which are the  $\ell_p$  Lewis weights of the matrix  $A_{[n] \setminus J, *}$ .
  - (b) For each  $i \in [n] \setminus J$ , if

$$d^{\max\{0, p/2-1\}} u_i \geq \frac{1}{2\alpha},$$

then add  $i$  into  $J$ .

Figure 6. Algorithm for finding the set  $J$ .

**Theorem B.1.** For a given matrix  $A \in \mathbb{R}^{n \times d}$ ,  $\tau \geq 0$  and  $p \geq 1$ , the algorithm in Figure 6 returns a set of indices  $J \subseteq [n]$  with size  $|J| \leq O(d^{\max\{p/2, 1\}} \cdot \alpha^2)$ , such that for all  $y \in \mathbf{im}(A)$ , if  $y$  satisfies (i)  $\|y_{L_y}\|_p^p \leq \alpha \cdot \tau^p$  and (ii)  $|H_y| \leq \alpha$ , then  $H_y \subseteq J$ .

*Proof.* Consider a fixed vector  $y \in \mathbf{im}(A)$  that satisfies (i)  $\|y_{L_y}\|_p^p \leq \alpha \cdot \tau^p$  and (ii)  $|H_y| \leq \alpha$ . For ease of notation, we assume  $|y_1| \geq |y_2| \geq \dots \geq |y_n|$ . Of course, this order is unknown and is not used by our algorithm. Under this assumption,  $H_y = \{1, 2, \dots, |H_y|\}$ .

We prove  $H_y \subseteq J$  by induction. For any  $i < |H_y|$ , suppose  $[i] \subseteq J$  and  $i+1 \notin J$  after the  $i$ -th repetition of Step 2, we show that we will add  $i+1$  into  $J$  in the  $(i+1)$ -th repetition of Step 2. Since,  $[i] \subseteq J$  and  $|y_1| \geq |y_2| \geq \dots \geq |y_n|$ ,

$$\|y_{[n] \setminus J}\|_p^p \leq \|y_{L_y}\|_p^p + \alpha |y_{i+1}|^p \leq \alpha \tau^p + \alpha |y_{i+1}|^p.$$

Since  $i+1 \in H_y$ , we must have  $|y_{i+1}| \geq \tau$ , which implies

$$\frac{|y_{i+1}|^p}{\|y_{[n] \setminus J}\|_p^p} \geq \frac{1}{2\alpha}.$$

By Lemma A.8, this implies

$$d^{\max\{0, p/2-1\}} u_{i+1} \geq \frac{1}{2\alpha},$$

1. Let  $|J| = O(d^{\max\{p/2, 1\}} \cdot \alpha^2)$  as in Corollary B.2.
2. Repeat the following for  $O(\log(|J|/\delta_{\text{struct}}))$  times:
  - (a) Randomly partition  $[n]$  into  $\Gamma_1, \Gamma_2, \dots, \Gamma_\alpha$ .
  - (b) For each  $j \in [\alpha]$ , use the algorithm in Theorem A.2 to obtain weights  $\{\hat{u}_i\}_{i \in \Gamma_j}$  such that  $u_i \leq \hat{u}_i \leq 2u_i$ , where  $\{u_i\}_{i \in \Gamma_j}$  are the  $\ell_p$  Lewis weights of the matrix  $A_{\Gamma_j, *}$ .
  - (c) For each  $j \in [\alpha]$ , for each  $i \in \Gamma_j$ , if
 
$$d^{\max\{0, p/2-1\}} \hat{u}_i \geq \frac{1}{6},$$
 then add  $i$  to  $I$ .

 Figure 7. Algorithm for finding the set  $I$ .

where  $u_{i+1}$  is the  $\ell_p$  Lewis weight of the row  $A_{i+1, *}$  in  $A_{[n] \setminus J, *}$ , in which case we will add  $i + 1$  into  $J$ . Thus,  $H_y \subseteq J$  since  $|H_y| \leq \alpha$ .

Now we analyze the size of  $J$ . For the algorithm in Figure 6, we repeat the whole procedure  $\alpha$  times. Each time, an index  $i$  will be added into  $I$  if and only if

$$d^{\max\{0, p/2-1\}} u_i \geq \frac{1}{2\alpha}.$$

However, since

$$\sum_{i \in [n] \setminus J} u_i = \sum_{i \in [n] \setminus J} \bar{u}_i^p \leq d$$

by Theorem A.5, there are at most  $O(d^{\max\{p/2, 1\}} \cdot \alpha)$  such indices  $i$ . Thus, the total size of  $J$  is upper bounded by  $O(d^{\max\{p/2, 1\}} \cdot \alpha^2)$ .  $\square$

The above algorithm also implies the following existential result.

**Corollary B.2.** *For a given matrix  $A \in \mathbb{R}^{n \times d}$ ,  $\tau \geq 0$  and  $p \geq 1$ , there exists a set of indices  $J \subseteq [n]$  with size  $|J| \leq O(d^{\max\{p/2, 1\}} \cdot \alpha^2)$ , such that for all  $y \in \mathbf{im}(A)$ , if  $y$  satisfies (i)  $\|y_{L_y}\|_p^p \leq \alpha \cdot \tau^p$  and (ii)  $|H_y| \leq \alpha$ , then  $H_y \subseteq J$ .*

## B.2. An Input-sparsity Time Algorithm

To find a set of heavy coordinates, the algorithm in Theorem B.1 runs in polynomial time. In this section we present an algorithm for finding heavy coordinates that runs in input-sparsity time. The algorithm is described in Figure 7.

**Theorem B.3.** *For a given matrix  $A \in \mathbb{R}^{n \times d}$ ,  $\tau \geq 0$ ,  $\delta_{\text{struct}} \in (0, 1)$ , and  $p \geq 1$ , the algorithm in Figure 7 returns a set of indices  $I \subseteq [n]$  with size  $|I| \leq \tilde{O}(d^{\max\{p/2, 1\}} \alpha \cdot \log(1/\delta_{\text{struct}}))$ , such that with probability at least  $1 - \delta_{\text{struct}}$ , simultaneously for all  $y \in \mathbf{im}(A)$ , if  $y$  satisfies (i)  $\|y_{L_y}\|_p^p \leq \alpha \cdot \tau^p$  and (ii)  $|H_y| \leq \alpha$ , then  $H_y \subseteq I$ . Furthermore, the algorithm runs in  $\tilde{O}((\text{nnz}(A) + d^{p/2+O(1)}) \cdot \alpha \cdot \log(1/\delta_{\text{struct}}))$  time.*

*Proof.* Let  $J$  be the set with size  $|J| \leq O(d^{\max\{p/2, 1\}} \cdot \alpha^2)$  whose existence is proved in Corollary B.2. For all  $y \in \mathbf{im}(A)$ , if  $y$  satisfies (i)  $\|y_{L_y}\|_p^p \leq \alpha \cdot \tau^p$  and (ii)  $|H_y| \leq \alpha$ , then  $H_y \subseteq J$ . We only consider those  $c \in J$  for which there exists  $y \in \mathbf{im}(A)$  such that (i)  $\|y_{L_y}\|_p^p \leq \alpha \cdot \tau^p$ , (ii)  $|H_y| \leq \alpha$  and (iii)  $c \in H_y$ , since we can remove other  $c$  from  $J$  and the properties of  $J$  still hold. For such  $c \in H_y$  and the corresponding  $y \in \mathbf{im}(A)$ , suppose for some  $j \in [\alpha]$  we have  $c \in \Gamma_j$ . Since  $|H_y| \leq \alpha$ , with probability  $(1 - 1/\alpha)^{|H_y|-1} \geq 1/e$ , we have  $\Gamma_j \cap H_y = \{c\}$ . Furthermore,  $\mathbb{E}[\|y_{L_y \cap \Gamma_j}\|_p^p] = \|y_{L_y}\|_p^p / \alpha \leq \tau^p$ . By Markov's inequality, with probability at least 0.8, we have  $\|y_{L_y \cap \Gamma_j}\|_p^p \leq 5\tau^p$ . Thus, by a union bound, with probability at least  $1/e - 0.2 > 0.1$ , we have  $\|y_{L_y \cap \Gamma_j}\|_p^p \leq 5\tau^p$  and  $\Gamma_j \cap H_y = \{c\}$ . By repeating  $O(\log(|J|/\delta_{\text{struct}}))$  times, the success probability is at least  $1 - \delta_{\text{struct}}/|J|$ . Applying a union bound over all  $c \in J$ , with probability  $1 - \delta_{\text{struct}}$ , the stated conditions hold for all  $c \in J$ . We condition on this event in the rest of the proof.

Consider any  $c \in J$  and  $y \in \mathbf{im}(A)$  with the properties stated above. Since  $|y_c| \geq \tau$ , we have

$$\frac{|y_c|^p}{\|y_{\Gamma_j}\|_p^p} \geq \frac{|y_c|^p}{\|y_{\Gamma_j \cap L_y}\|_p^p + |y_c|^p} \geq \frac{1}{6}.$$

By Lemma A.8, we must have

$$d^{\max\{0, p/2-1\}} u_c \geq \frac{1}{6},$$

where  $u_c$  is the  $\ell_p$  Lewis weight of the row  $A_{c,*}$  in the matrix  $A_{\Gamma_j,*}$ , which also implies

$$d^{\max\{0, p/2-1\}} \hat{u}_c \geq \frac{1}{6}$$

since  $\hat{u}_c \geq u_c$ , in which case we will add  $c$  to  $I$ .

Now we analyze the size of  $I$ . For each  $j \in [\alpha]$ , we have

$$\sum_{i \in \Gamma_j} \hat{u}_i \leq 2 \sum_{i \in \Gamma_j} u_i = 2 \sum_{i \in \Gamma_j} \bar{u}_i^p \leq 2d$$

by Theorem A.5. For each  $j \in [\alpha]$ , there are at most  $O(d^{\max\{p/2, 1\}})$  indices  $i$  which satisfy

$$d^{\max\{0, p/2-1\}} \hat{u}_i \geq \frac{1}{6},$$

which implies we will add at most  $O(\alpha \cdot d^{\max\{p/2, 1\}})$  elements into  $I$  during each repetition. The bound on the size of  $I$  follows since there are only  $O(\log(|J|/\delta_{\text{struct}})) = O(\log d + \log \alpha + \log(1/\delta_{\text{struct}}))$  repetitions.

For the running time of the algorithm, since we invoke the algorithm in Theorem A.4 for  $O(\log(|J|/\delta_{\text{struct}}))$  times, and each time we estimate the  $\ell_p$  Lewis weights of  $A_{\Gamma_1,*}, A_{\Gamma_2,*}, \dots, A_{\Gamma_{|\alpha|},*}$ , which implies the running time for each repetition is upper bounded by

$$\sum_{j=1}^{|\alpha|} \tilde{O}\left(\text{nnz}(A_{\Gamma_j,*}) + d^{p/2+O(1)}\right) = \tilde{O}\left(\text{nnz}(A) + d^{p/2+O(1)} \cdot \alpha\right).$$

The bound on the running time follows since we repeat for  $O(\log(|J|/\delta_{\text{struct}}))$  times.  $\square$

The above algorithm and the probabilistic method also imply the following existential result.

**Corollary B.4.** *For a given matrix  $A \in \mathbb{R}^{n \times d}$ ,  $\tau \geq 0$  and  $p \geq 1$ , there exists a set of indices  $I \subseteq [n]$  with size  $|I| \leq \tilde{O}(d^{\max\{p/2, 1\}} \cdot \alpha)$ , such that for all  $y \in \mathbf{im}(A)$ , if  $y$  satisfies (i)  $\|y_{L_y}\|_p^p \leq \alpha \cdot \tau^p$  and (ii)  $|H_y| \leq \alpha$ , then  $H_y \subseteq I$ .*

## C. The Net Argument

### C.1. Bounding the Norm

We will generally assume that for product  $Ax$ , the  $x$  involved is in  $\mathbf{im}(A^\top)$ , which is the orthogonal complement of the nullspace of  $A$ ; any nullspace component of  $x$  would not affect  $Ax$  or  $SAx$ , and so can be neglected for our purposes.

**Lemma C.1.** *When the entries of  $A$  are integral, for any nonempty  $\mathcal{S} \subset [n]$ ,  $\|A_{\mathcal{S},*}^+\|_2 \leq \|A\|_2 \text{CP}(A) \sqrt{d}$ , and under also Assumption 2.2,  $\|A_{\mathcal{S},*}^+\|_2 \leq n^{O(d^2)}$ .*

*Proof.* When  $\mathcal{S}$  is a nonempty proper subset of  $[n]$ , then since  $\|A_{\mathcal{S},*}\|_2 \leq \|A\|_2$  and  $\text{CP}(A_{\mathcal{S},*}) \leq \text{CP}(A)$ , we have that if  $\|A_{\mathcal{S},*}^+\|_2 \leq \|A_{\mathcal{S},*}\|_2^d \text{CP}(A_{\mathcal{S},*}) \sqrt{d}$ , then the lemma follows. So we can assume  $\mathcal{S} = [n]$ .

First suppose  $A$  has full column rank, so that  $A^\top A$  is invertible. For any  $y \in \mathbb{R}^n$ ,  $A^+ y$  is the unique solution  $x^*$  of  $A^\top A x = A^\top y$ . Applying Cramer's rule, the entries of  $x^*$  have the form  $x_i = \frac{\det B_i}{\det A^\top A}$ , where  $B_i$  is the same as  $A^\top A$ , except that the  $i$ 'th column of  $B_i$  is  $A^\top y$ . The integrality of  $A$  implies  $|\det A^\top A| \geq 1$ ; using that together with Hadamard's

determinant inequality and the definition of the spectral norm, we have  $\|x^*\|_2 \leq \|A\|_2^d \text{CP}(A) \|y\|_2 \sqrt{d}$ . Since this holds for any  $y$ , we have  $\|A^+\|_2 \leq \|A\|_2^d \text{CP}(A) \sqrt{d}$  as claimed.

Now suppose  $A$  has rank  $k < d$ . Then there is  $\mathcal{T} \subset [d]$  of size  $k$  whose members are indices of a set of  $k$  linearly independent columns of  $A$ . Moreover, if  $x^* = A^+y$  is a solution to  $\min_x \|Ax - y\|_2$ , then there is another solution where the entries with indices in  $[d] \setminus \mathcal{T}$  are zero, since a given column not in  $\mathcal{T}$  is a linear combination of columns in  $\mathcal{T}$ . That is, the solution to  $\min_{x \in \mathbb{R}^k} \|A_{*,\mathcal{T}}x - y\|_2$  can be mapped directly to a solution  $x^*$  in  $\mathbb{R}^k$  with the same Euclidean norm. Since  $A_{*,\mathcal{T}}$  has full column rank, the analysis above implies that

$$\|x^*\|_2 \leq \|A_{*,\mathcal{T}}\|_2^k \text{CP}(A_{*,\mathcal{T}}) \|y\|_2 \sqrt{k} \leq \|A\|_2^d \text{CP}(A) \|y\|_2 \sqrt{d},$$

so the bound on  $\|A^+\|_2$  holds also when  $A$  has less than full rank.

The last statement of the lemma follows directly, using the definitions of  $\|A\|_2$ ,  $\text{CP}(A)$ , and Assumption 2.2.  $\square$

**Lemma C.2.** *If  $A$  has integral entries, and if Assumptions 1, 2.2, 2.3 hold, then Assumption 2.1 holds.*

*Proof.* Let  $x_M^{C_1}$  be a  $C_1$ -approximate solution of  $\min_x \|Ax - b\|_M$ , which Assumption 2.1 requires to have bounded Euclidean norm. Let  $\hat{M}(a) \equiv \min\{\tau^p, |a|^p\}$ , so that Assumptions 1.4 and 1.5 imply that  $L_M \hat{M}(a) \leq M(a) \leq U_M \hat{M}(a)$  for all  $a$ . Letting  $x_M^* \equiv \text{argmin}_x \|Ax - b\|_M$ , and similarly defining  $x_{\hat{M}}^*$ , this condition implies that

$$\begin{aligned} \|Ax_M^{C_1} - b\|_{\hat{M}} &\leq \frac{1}{L_M} \|Ax_M^{C_1} - b\|_M \\ &\leq \frac{C_1}{L_M} \|Ax_M^* - b\|_M \\ &\leq C_2 \|Ax_M^* - b\|_{\hat{M}} \\ &\leq C_2 \|Ax_{\hat{M}}^* - b\|_{\hat{M}}, \end{aligned} \tag{3}$$

where  $C_2 \equiv C_1 U_M / L_M$ .

Let  $\mathcal{S}$  denote the set of indices at which  $|A_{i,*}x_M^{C_1} - b_i| \leq \tau$ . If  $\mathcal{S}$  is empty, then  $x_M^{C_1}$  can be assumed to be zero.

Similarly to our general assumption that  $x_M^{C_1} \in \text{im}(A^\top)$ , we can assume that  $x_M^{C_1} \in \text{im}(A_{\mathcal{S},*}^\top)$ , since any component of  $x_M^{C_1}$  in the nullspace of  $A_{\mathcal{S},*}$  can be removed without changing  $A_{\mathcal{S},*}x_M^{C_1}$ , and without increasing the  $n - |\mathcal{S}|$  contributions of  $\tau^p$  from the remaining summands in  $\|Ax_M^{C_1} - b\|_M$ . (Here we used Assumption 1.5 that  $M(a) = \tau^p$  for  $|a| \geq \tau$ .)

From  $x_M^{C_1} \in \text{im}(A^\top)$  it follows that  $\|x_M^{C_1}\|_2 = \|A_{\mathcal{S},*}^+ A_{\mathcal{S},*} x_M^{C_1}\|_2 \leq \|A_{\mathcal{S},*}^+\|_2 \|A_{\mathcal{S},*} x_M^{C_1}\|_2$ , and since

$$\begin{aligned} \|A_{\mathcal{S},*} x_M^{C_1}\|_2 &\leq \sqrt{n} \|A_{\mathcal{S},*} x_M^{C_1}\|_p \\ &\leq \sqrt{n} (\|A_{\mathcal{S},*} x_M^{C_1} - b_{\mathcal{S}}\|_p + \|b_{\mathcal{S}}\|_p) \\ &\leq C_2 \sqrt{n} (\|Ax_{\hat{M}}^* - b\|_{\hat{M}}^{1/p} + \|b_{\mathcal{S}}\|_p) \quad (\text{by (3)}) \\ &\leq 2C_2 \sqrt{n} \|b\|_p, \end{aligned}$$

we have  $\|x_M^{C_1}\|_2 \leq \|A_{\mathcal{S},*}^+\|_2 \|A_{\mathcal{S},*} x_M^{C_1}\|_2 \leq \|A_{\mathcal{S},*}^+\|_2 2C_2 \sqrt{n} \|b\|_p$ , and so from Lemma C.1 and Assumption 2.2, the bound on  $\|x_M^{C_1}\|_2$  of Assumption 2.1 follows.  $\square$

## C.2. Net Constructions

**Lemma C.3.** *Under the given assumptions, for  $U$  as in Assumption 2.1, there exists a set  $\mathcal{N}_\varepsilon \subseteq \text{im}([A \ b])$  with size  $|\mathcal{N}_\varepsilon| \leq n^{O(d^3)} \cdot (1/\varepsilon)^{O(d)}$ , such that for any  $x$  satisfying  $\|x\|_2 \leq U$ , there exists  $y' \in \mathcal{N}_\varepsilon$  such that*

$$\|(Ax - b) - y'\|_M \leq \varepsilon^p.$$

*Proof.* Let  $\hat{M}(a) \equiv \min\{\tau^p, |a|^p\}$ . Assume for now that  $\varepsilon \leq \tau/2$ , so that if  $\|Ax\|_{\hat{M}} \leq \varepsilon^p$ , then every entry of  $Ax$  is no more than  $\tau$  in magnitude, and so  $\|Ax\|_{\hat{M}} = \|Ax\|_p^p$ .



Let

$$B_\varepsilon \equiv \{Ax - b \mid \|Ax - b\|_{\hat{M}} \leq \varepsilon^p\} = \{Ax - b \mid \|Ax - b\|_p \leq \varepsilon\}$$

and

$$B_U \equiv \{Ax - b \mid \|x\|_2 \leq U\} \subseteq \{Ax - b \mid \|Ax - b\|_p \leq \sqrt{n} \cdot (\|A\|_2 U + \|b\|_2)\}.$$

From the scale invariance of the  $\ell_p$  norm, and the volume in at-most  $d$  dimensions,  $\text{Vol}(B_\varepsilon) \geq (\varepsilon/(\sqrt{n} \cdot (\|A\|_2 U + \|b\|_2)))^d \text{Vol}(B_U)$ , so that at most  $(\sqrt{n} \cdot (\|A\|_2 U + \|b\|_2)/\varepsilon)^d$  translates of  $B_\varepsilon$  can be packed into  $B_U$  without intersecting. Thus the set  $\mathcal{N}_\varepsilon$  of centers of such a maximal packing of translates is an  $\varepsilon^p$ -cover of  $B_U$ , that is, for any point  $y \in B_U$ , there is some  $y' \in \mathcal{N}$  such that  $\|y' - y\|_p \leq \varepsilon$ , so that  $\|y' - y\|_{\hat{M}} \leq \varepsilon^p$ .

If  $\varepsilon > \tau/2$ , we just note that a  $(\tau/2)^p$ -cover is also an  $\varepsilon^p$ -cover, and so there is an  $\varepsilon^p$ -cover of size  $(\sqrt{n} \cdot (\|A\|_2 U + \|b\|_2)/\min\{\tau/2, \varepsilon\})^d$ .

Plugging in the bounds for  $U$  from Assumption 2.1, and for  $\tau$ ,  $\|b\|_2$ , and  $\|A\|_2 \leq \max_{i \in [d]} \|A_{*,i}\|_2$  from Assumptions 2.2 and 2.3, the cardinality bound of the lemma follows.

This argument is readily adapted to more general  $\|\cdot\|_M$ , by noticing that  $\|y - y'\|_M \leq U_M \cdot \|y - y'\|_{\hat{M}}$  using Assumption 1.4 and adjusting constants.  $\square$

**Lemma C.4.** *Under the given assumptions, there exists a set  $\mathcal{M}_\varepsilon^{\alpha,\beta} \subseteq \text{im}([A \ b])$  with size  $|\mathcal{M}_\varepsilon^{\alpha,\beta}| \leq O\left(\frac{\beta/\alpha}{\varepsilon}\right) \cdot n^{O(d^2)}$ .  $(1/\varepsilon)^{O(d)}$ , such that for any  $x$  satisfying  $\alpha \leq \|Ax - b\|_p \leq \beta \leq \tau$ , there exists  $y' \in \mathcal{M}_\varepsilon^{\alpha,\beta}$  such that*

$$\|(Ax - b) - y'\|_M \leq \varepsilon^p \cdot \|Ax - b\|_M.$$

*Proof.* We assume  $\varepsilon \leq \tau$ , since otherwise we can take  $\varepsilon$  to be  $\tau$ . By standard constructions (see, e.g., (Woodruff, 2014, p. 48)), there exists a set  $\mathcal{M}_\gamma \subseteq \text{im}([A \ b])$  with size  $|\mathcal{M}_\gamma| \leq (1/\varepsilon)^{O(d)}$ , such that for any  $y = Ax - b$  with  $\|y\|_p = \gamma$ , there exists  $y' \in \mathcal{M}_\gamma$  such that  $\|y - y'\|_p \leq \gamma \cdot \varepsilon$ .

Let  $\mathcal{M}_\varepsilon^{\alpha,\beta}$  be

$$\mathcal{M}_\varepsilon^{\alpha,\beta} = \mathcal{M}_\alpha \cup \mathcal{M}_{(1+\varepsilon)\alpha} \cup \mathcal{M}_{(1+\varepsilon)^2\alpha} \cup \dots \cup \mathcal{M}_\beta.$$

Clearly, by Assumption 2,

$$|\mathcal{M}_\varepsilon^{\alpha,\beta}| \leq \log_{1+\varepsilon}(\beta/\alpha) \cdot n^{O(d^2)} \cdot (1/\varepsilon)^{O(d)} \leq O\left(\frac{\beta/\alpha}{\varepsilon}\right) \cdot n^{O(d^2)} \cdot (1/\varepsilon)^{O(d)}.$$

Now we show that  $\mathcal{M}_\varepsilon^{\alpha,\beta}$  satisfies the desired properties. For any  $x \in \mathbb{R}^d$  such that  $y = Ax - b$  satisfies  $\alpha \leq \|y\|_p \leq \beta \leq \tau$ , we must have  $|y_i| \leq \tau$  for all entries of  $y$ . By normalization, there exists  $\hat{y}$  such that  $\|y - \hat{y}\|_p \leq \varepsilon \cdot \|y\|_p$  and  $\|\hat{y}\|_p = (1 + \varepsilon)^i \cdot \alpha$  for some  $i \in \mathbb{N}$ . Furthermore, by the property of  $\mathcal{M}_{(1+\varepsilon)^i\alpha}$ , there exists  $y' \in \mathcal{M}_{(1+\varepsilon)^i\alpha} \subseteq \mathcal{M}_\varepsilon^{\alpha,\beta}$  such that  $\|\hat{y} - y'\|_p \leq \varepsilon \cdot \|y'\|_p \leq 2\varepsilon \cdot \|y\|_p$ . Thus, by triangle inequality, we have  $\|y - y'\|_p \leq 3\varepsilon \|y\|_p$ . For sufficiently small  $\varepsilon$ , since  $\|y\|_p \leq \tau$ , we also have  $\|y - y'\|_p \leq \tau$ , which implies  $\|y - y'\|_\infty \leq \tau$ . Thus, using Assumption 1.4, we have

$$\|y - y'\|_M \leq U_M \|y - y'\|_p^p \leq U_M \cdot (3\varepsilon)^p \cdot \|y\|_p^p \leq U_M/L_M (3\varepsilon)^p \|y\|_M.$$

Adjusting constants implies the desired properties.  $\square$

### C.3. The Net Argument

**Theorem C.5.** *For any  $A \in \mathbb{R}^{n \times d}$  and  $b \in \mathbb{R}^n$ , given a matrix  $S \in \mathbb{R}^{r \times n}$  and a weight vector  $w \in \mathbb{R}^n$  such that  $w_i \geq 0$  for all  $i \in [n]$ . Let  $c = \min_x \|Ax - b\|_p$ . If there exist  $U_O, U_A, L_A, L_N \leq \text{poly}(n)$  such that*

1.  $\|S(Ax_M^* - b)\|_{M,w} \leq U_O \|Ax_M^* - b\|_M$ , where  $x_M^* = \text{argmin}_x \|Ax - b\|_M$ ;
2.  $L_A \|Ax - b\|_M \leq \|S(Ax - b)\|_{M,w} \leq U_A \|Ax - b\|_M$  for all  $x \in \mathbb{R}^d$ ;
3.  $\|Sy\|_{M,w} \geq L_N \|y\|_M$  for all  $y \in \mathcal{N}_{\text{poly}(\varepsilon \cdot \tau/n)} \cup \mathcal{M}_{\text{poly}(\varepsilon/n)}^{c, \text{poly}(n)}$ ,

then, any  $C$ -approximate solution of  $\min_x \|S(Ax - b)\|_{M,w}$  with  $C \leq \text{poly}(n)$  is a  $C \cdot (1 + O(\varepsilon)) \cdot U_O/L_N$ -approximate solution of  $\min_x \|Ax - b\|_M$ . Here  $\mathcal{N}_{\text{poly}(\varepsilon \cdot \tau/n)}$  and  $\mathcal{M}_{\text{poly}(\varepsilon/n)}^{c, c \cdot \text{poly}(n)}$  are as defined in Lemma C.3 and Lemma C.4, respectively.

*Proof.* We distinguish two cases in the proof.

**Case 1:**  $(C \cdot U_M \cdot U_A / (L_M \cdot L_A)) \cdot c^p \leq \tau^p$ . In this case, we prove that any  $C$ -approximate solution  $x_{S,M,w}^C$  of  $\min_x \|S(Ax - b)\|_{M,w}$  satisfies  $c \leq \|Ax_{S,M,w}^C - b\|_p \leq (C \cdot U_M \cdot U_A / (L_M \cdot L_A))^{1/p} \cdot c \leq \tau$ . Let  $x_p^* = \arg\min_x \|Ax - b\|_p$ , we have

$$\begin{aligned} & \|Ax_{S,M,w}^C - b\|_M \\ & \leq \|S(Ax_{S,M,w}^C - b)\|_{M,w} / L_A \\ & \leq C \cdot \|S(Ax_p^* - b)\|_{M,w} / L_A \\ & \leq C \cdot \|Ax_p^* - b\|_M \cdot U_A / L_A \\ & \leq C \cdot \|Ax_p^* - b\|_p^p \cdot (U_M \cdot U_A) / L_A \\ & = C \cdot c^p \cdot (U_M \cdot U_A) / L_A. \end{aligned}$$

Since  $L_M \leq 1$ , this implies  $\|Ax_{S,M,w}^C - b\|_M \leq \tau^p$ , which implies  $\|Ax_{S,M,w}^C - b\|_\infty \leq \tau$ . Thus,  $\|Ax_{S,M,w}^C - b\|_p^p \leq \|Ax_{S,M,w}^C - b\|_M / L_M \leq (C \cdot U_M \cdot U_A / (L_M \cdot L_A)) \cdot c^p$ , which implies  $\|Ax_{S,M,w}^C - b\|_p \leq (C \cdot U_M \cdot U_A / (L_M \cdot L_A))^{1/p} \cdot c$ . Moreover, by the definition of  $c$  we have  $\|Ax_{S,M,w}^C - b\|_p \geq c$ .

Since  $(C \cdot U_M \cdot U_A / (L_M \cdot L_A))^{1/p} \leq \text{poly}(n)$ , by Lemma C.4, there exists  $y' \in \mathcal{M}_{\text{poly}(\varepsilon/n)}^{c, c \cdot \text{poly}(n)}$  such that  $\|(Ax_{S,M,w}^C - b) - y'\|_M \leq \text{poly}(\varepsilon/n) \cdot \|Ax_{S,M,w}^C - b\|_M$ . Notice that

$$\|S(Ax_{S,M,w}^C - b)\|_{M,w} = \|Sy' + S((Ax_{S,M,w}^C - b) - y')\|_{M,w}.$$

For  $Sy'$ , since  $y' \in \mathcal{M}_{\text{poly}(\varepsilon/n)}^{c, c \cdot \text{poly}(n)}$ , we have

$$\|Sy'\|_{M,w} \geq L_N \|y'\|_M = L_N \|Ax_{S,M,w}^C - b + (y' - (Ax_{S,M,w}^C - b))\|_M.$$

Since  $\|y' - (Ax_{S,M,w}^C - b)\|_M \leq \text{poly}(\varepsilon/n) \cdot \|Ax_{S,M,w}^C - b\|_M$ , by Lemma A.3, we have  $\|Ax_{S,M,w}^C - b + (y' - (Ax_{S,M,w}^C - b))\|_M \geq (1 - \varepsilon) \|Ax_{S,M,w}^C - b\|_M$ , which implies  $\|Sy'\|_{M,w} \geq L_N(1 - \varepsilon) \|Ax_{S,M,w}^C - b\|_M$ . On the other hand,  $\|S((Ax_{S,M,w}^C - b) - y')\|_{M,w} \leq U_A \|(Ax_{S,M,w}^C - b) - y'\|_M \leq \text{poly}(\varepsilon/n) \cdot \|Ax_{S,M,w}^C - b\|_M$ . Again by Lemma A.3, we have  $\|S(Ax_{S,M,w}^C - b)\|_{M,w} \geq (1 - \varepsilon) \|Sy'\|_{M,w} \geq L_N(1 - O(\varepsilon)) \|Ax_{S,M,w}^C - b\|_M$ . Furthermore, since  $x_{S,M,w}^C$  is a  $C$ -approximate solution of  $\min_x \|S(Ax - b)\|_{M,w}$ , we must have

$$\begin{aligned} \|Ax_{S,M,w}^C - b\|_M & \leq (1 + O(\varepsilon)) / L_N \cdot \|S(Ax_{S,M,w}^C - b)\|_{M,w} \\ & \leq C \cdot (1 + O(\varepsilon)) / L_N \cdot \|S(Ax_M^* - b)\|_{M,w} \\ & \leq C \cdot (1 + O(\varepsilon)) \cdot U_O / L_N \cdot \|Ax_M^* - b\|_M. \end{aligned}$$

**Case 2:**  $(C \cdot U_M \cdot U_A / (L_M \cdot L_A)) \cdot c^p \geq \tau^p$ . In this case, we first prove that any  $C$ -approximate solution  $x_{S,M,w}^C$  of  $\min_x \|S(Ax - b)\|_{M,w}$  is a  $\text{poly}(n)$ -approximate solution of  $\min_x \|Ax - b\|_M$ . By Assumption 2.1, this implies all  $C$ -approximate solution  $x_{S,M,w}^C$  of  $\min_x \|S(Ax - b)\|_{M,w}$  satisfies  $\|x_{S,M,w}^C\|_2 \leq U$ .

Consider any  $C$ -approximate solution  $x_{S,M,w}^C$  of  $\min_x \|S(Ax - b)\|_{M,w}$ , we have

$$\begin{aligned} \|Ax_{S,M,w}^C - b\|_M & \leq \|S(Ax_{S,M,w}^C - b)\|_{M,w} / L_A \leq C \cdot \|S(Ax_M^* - b)\|_{M,w} / L_A \\ & \leq C \cdot U_A / L_A \cdot \|Ax_M^* - b\|_M \leq \text{poly}(n) \cdot \|Ax_M^* - b\|_M. \end{aligned}$$

We further show that  $\|Ax - b\|_M \geq \tau^p / \text{poly}(n)$  for all  $x \in \mathbb{R}^d$ . If  $\|Ax - b\|_\infty \geq \tau$ , then the statement clearly holds. Otherwise,  $\|Ax - b\|_M \geq L_M \cdot \|Ax - b\|_p^2 \geq L_M c^p \geq L_M^2 L_A / (C \cdot U_M \cdot U_A) \cdot \tau^p \geq \tau^p / \text{poly}(n)$ . Thus, for any  $C$ -approximate solution  $x_{S,M,w}^C$  of  $\min_x \|S(Ax - b)\|_{M,w}$ , there exists  $y' \in \mathcal{N}_{\text{poly}(\varepsilon \cdot \tau/n)}$  such that

$$\|y' - (Ax_{S,M,w}^C - b)\|_M \leq \text{poly}(\varepsilon \cdot \tau/n) \leq \text{poly}(\varepsilon/n) \cdot \|Ax_{S,M,w}^C - b\|_M.$$

The rest of the proof is exactly the same as that of Case 1.  $\square$

## D. A Row Sampling Algorithm for Tukey Loss Functions

In this section we present the row sampling algorithm. The row sampling algorithm proceeds in a recursive manner. We describe a single recursive step in Section D.1 and the overall algorithm in Section D.2.

### D.1. One Recursive Step

The goal of this section is to design one recursive step of the row sampling algorithm. For a weight vector  $w \in \mathbb{R}^n$ , the recursive step outputs a sparser weight vector  $w' \in \mathbb{R}^n$  such that for any set  $\mathcal{N} \subseteq \text{im}(A)$  with size  $|\mathcal{N}|$ , with probability at least  $1 - \delta_o$ , simultaneously for all  $y \in \mathcal{N}$ ,

$$\|y\|_{M,w'} = (1 \pm \varepsilon) \|y\|_{M,w}.$$

We maintain that if  $w_i \neq 0$ , then  $w_i \geq 1$  and  $\|w\|_\infty \leq n^2$  as an invariant in the recursion. These conditions imply that we can partition the positive coordinates of  $w$  into  $2 \log n$  groups  $P_j$ , for which  $P_j = \{i \mid 2^{j-1} \leq w_i < 2^j\}$ .

Now we define one recursive step of our sampling procedure. We split the matrix  $A$  into  $A_{P_1,*}, A_{P_2,*}, \dots, A_{P_{2 \log n},*}$ , and deal with each of them separately. For each  $1 \leq j \leq 2 \log n$ , we invoke the algorithm in Theorem B.3 to identify a set  $I_j$  for the matrix  $A_{P_j,*}$ , for some parameter  $\alpha$  and  $\delta_{\text{struct}}$  to be determined. For each  $1 \leq j \leq 2 \log n$ , we also use the algorithm in Theorem A.4 to calculate  $\{\hat{u}_i\}_{i \in P_j}$  such that  $u_i \leq \hat{u}_i \leq 2u_i$  where  $\{u_i\}_{i \in P_j}$  are the  $\ell_p$  Lewis weights of the matrix  $A_{P_j,*}$ .

Now for each  $i \in P_j$ , we define its sampling probability  $p_i$  to be

$$p_i = \begin{cases} 1 & i \in I_j \\ \min\{1, 1/2 + \Theta(d^{\max\{0, p/2-1\}} \hat{u}_i \cdot Y)\} & i \notin I_j \end{cases},$$

where  $Y \equiv d \log(1/\varepsilon) + \log(\log n / \delta_o) + U_M / L_M \log(|\mathcal{N}| \cdot \log n / \delta_o) / \varepsilon^2$ .

For each  $i \in [n]$ , we set  $w'_i = 0$  with probability  $1 - p_i$ , and set  $w'_i = w_i / p_i$  with probability  $p_i$ . This finishes the definition of one step of the sampling procedure.

Let

$$F \equiv \sum_{1 \leq j \leq 2 \log n} |I_j| + \sum_{1 \leq j \leq 2 \log n} \sum_{i \in P_j \setminus I_j} \Theta(d^{\max\{0, p/2-1\}} \hat{u}_i \cdot Y).$$

Our first lemma shows that with probability at least  $1 - \delta_o$ , the number of non-zero entries in  $w'$  is at most  $\frac{2}{3} \|w\|_0$ , provided  $\|w\|_0$  is large enough.

**Lemma D.1.** *When  $\|w\|_0 \geq 10F$ , with probability at least  $1 - \delta_o$ ,*

$$\|w'\|_0 \leq \frac{2}{3} \|w\|_0.$$

*Proof.* Notice that

$$\mathbb{E}[\|w'\|_0] \leq \|w\|_0 / 2 + F.$$

By Bernstein's inequality in Lemma A.1, since  $F \geq \Omega(\log(1/\delta_o))$ , with probability at least  $1 - \exp(-\Omega(\|w\|_0)) \geq 1 - \exp(-\Omega(F)) \geq 1 - \delta_o$ , we have

$$\|w'\|_0 \leq \|w\|_0 / 2 + F + \|w\|_0 / 10 \leq \frac{2}{3} \|w\|_0. \quad \square$$

Our second lemma shows that  $\|w'\|_\infty$  is upper bounded by  $2\|w\|_\infty$ .

**Lemma D.2.**  $\|w'\|_\infty \leq 2\|w\|_\infty$ .

*Proof.* Since  $p_i \geq 1/2$  for all  $i \in [n]$ , we have  $\|w'\|_\infty \leq 2\|w\|_\infty$ . □

We show that for sufficiently large constant  $C$ , if we set

$$\alpha = C \cdot U_M / L_M \cdot \log(|\mathcal{N}| \cdot \log n / \delta_o) / \varepsilon^2$$

and  $\delta_{\text{struct}} = \delta_o / (4 \log n)$ , then with probability at least  $1 - \delta_o$ , simultaneously for all  $y \in \mathcal{N}$  we have

$$\|y\|_{M, w'} = (1 \pm \varepsilon) \|y\|_{M, w}.$$

By Theorem B.3 and Theorem A.5, since

$$\sum_{1 \leq j \leq 2 \log n} \sum_{i \in P_j \setminus I_j} \hat{u}_i \leq O(d \log n),$$

this also implies

$$F = \tilde{O}(d^{\max\{1, p/2\}} \log n \cdot (\log(|\mathcal{N}| / \delta_o) \cdot \log(1 / \delta_o) + d) / \varepsilon^2).$$

Furthermore, for each  $1 \leq j \leq 2 \log n$ , we invoke the algorithm in Theorem A.4 and the algorithm in Theorem B.3 on  $A_{P_1, *}, A_{P_2, *}, \dots, A_{P_{2 \log n}, *}$ , and thus the running time of each recursive step is thus upper bounded by

$$\tilde{O}((\text{nnz}(A) + d^{p/2+O(1)} \cdot \alpha) \cdot \log(1 / \delta_{\text{struct}})) = \tilde{O}((\text{nnz}(A) + d^{p/2+O(1)} \cdot \log(|\mathcal{N}| / \delta_o) \cdot / \varepsilon^2) \cdot \log(1 / \delta_o)).$$

Now we consider a fixed vector  $y \in \text{im}(A)$ . We use the following two lemmas in our analysis.

**Lemma D.3.** *With probability  $1 - \delta_o / O(|\mathcal{N}| \cdot \log n)$ , the following holds:*

- If  $\|y_{H_y \cap P_j}\|_{M, w} \geq C \cdot U_M \cdot \tau^p \cdot 2^{j-1} \cdot \log(|\mathcal{N}| \cdot \log n / \delta_o) / \varepsilon^2$ , then

$$\|y_{H_y \cap P_j}\|_{M, w'} = (1 \pm \varepsilon / 2) \|y_{H_y \cap P_j}\|_{M, w};$$

- If  $\|y_{H_y \cap P_j}\|_{M, w} < C \cdot U_M \cdot \tau^p \cdot 2^{j-1} \cdot \log(|\mathcal{N}| \cdot \log n / \delta_o) / \varepsilon^2$ , then

$$\|y_{H_y \cap P_j}\|_{M, w'} - \|y_{H_y \cap P_j}\|_{M, w} \leq C \cdot U_M \cdot \tau^p \cdot 2^{j-2} \cdot \log(|\mathcal{N}| \cdot \log n / \delta_o) / \varepsilon.$$

*Proof.* For each  $i \in H_y \cap P_j$ , we use  $Z_i$  to denote the random variable

$$Z_i = \begin{cases} w_i M(y_i) / p_i & \text{with probability } p_i \\ 0 & \text{with probability } 1 - p_i \end{cases}.$$

Since  $Z_i = w'_i M(y_i)$ , we have

$$\|y_{H_y \cap P_j}\|_{M, w'} = \sum_{i \in H_y \cap P_j} Z_i.$$

It is clear that  $Z_i \leq 2^{j+1} \cdot U_M \cdot \tau^p$  since  $p_i \geq 1/2$  and  $w_i \leq 2^j$ ,  $E[Z_i] = w_i M(y_i)$  and  $E[Z_i^2] = w_i^2 (M(y_i))^2 / p_i$ . By Hölder's inequality,

$$\sum_{i \in H_y \cap P_j} E[Z_i^2] \leq 2^{j+1} \cdot \|y_{H_y \cap P_j}\|_{M, w} \cdot U_M \cdot \tau^p.$$

Thus by Bernstein's inequality in Lemma A.1, we have

$$\Pr \left[ \left| \sum_{i \in H_y \cap P_j} Z_i - \|y_{H_y \cap P_j}\|_{M, w} \right| \geq t \right] \leq 2 \exp \left( - \frac{t^2}{2^{j+2} \cdot U_M \cdot \tau^p \cdot t/3 + 2^{j+2} \cdot \|y_{H_y \cap P_j}\|_{M, w} \cdot U_M \cdot \tau^p} \right).$$

When

$$\|y_{H_y \cap P_j}\|_{M, w} \geq C \cdot U_M \cdot \tau^p \cdot 2^{j-1} \cdot \log(|\mathcal{N}| \cdot \log n / \delta_o) / \varepsilon^2,$$

we take

$$t = \varepsilon / 2 \cdot \|y_{H_y \cap P_j}\|_{M, w} \geq C \cdot U_M \cdot \tau^p \cdot 2^{j-2} \cdot \log(|\mathcal{N}| \cdot \log n / \delta_o) / \varepsilon.$$

By taking  $C$  to be some sufficiently large constant, with probability at least  $1 - \delta_o/O(|\mathcal{N}| \cdot \log n)$ ,

$$\|y_{H_y \cap P_j}\|_{M,w'} = (1 \pm \varepsilon/2)\|y_{H_y \cap P_j}\|_{M,w}.$$

When

$$\|y_{H_y \cap P_j}\|_{M,w} < C \cdot U_M \cdot \tau^p \cdot 2^{j-1} \cdot \log(|\mathcal{N}| \cdot \log n / \delta_o) / \varepsilon^2,$$

we take

$$t = C \cdot U_M \cdot \tau^p \cdot 2^{j-2} \cdot \log(|\mathcal{N}| \cdot \log n / \delta_o) / \varepsilon.$$

By taking  $C$  to be some sufficiently large constant, with probability at least  $1 - \delta_o/O(|\mathcal{N}| \cdot \log n)$ ,

$$\| \|y_{H_y \cap P_j}\|_{M,w'} - \|y_{H_y \cap P_j}\|_{M,w} \| \leq C \cdot U_M \cdot \tau^p \cdot 2^{j-2} \cdot \log(|\mathcal{N}| \cdot \log n / \delta_o) / \varepsilon.$$

□

The proof of the following lemma is exactly the same as Lemma D.3.

**Lemma D.4.** *With probability  $1 - \delta_o/O(|\mathcal{N}| \cdot \log n)$ , the following holds:*

- If  $\|y_{L_y \cap P_j}\|_{M,w} \geq C \cdot U_M \cdot \tau^p \cdot 2^{j-1} \cdot \log(|\mathcal{N}| \cdot \log n / \delta_o) / \varepsilon^2$ , then

$$\|y_{L_y \cap P_j}\|_{M,w'} = (1 \pm \varepsilon/2)\|y_{L_y \cap P_j}\|_{M,w};$$

- If  $\|y_{L_y \cap P_j}\|_{M,w} < C \cdot U_M \cdot \tau^p \cdot 2^{j-1} \cdot \log(|\mathcal{N}| \cdot \log n / \delta_o) / \varepsilon^2$ , then

$$\| \|y_{L_y \cap P_j}\|_{M,w'} - \|y_{L_y \cap P_j}\|_{M,w} \| \leq C \cdot U_M \cdot \tau^p \cdot 2^{j-2} \cdot \log(|\mathcal{N}| \cdot \log n / \delta_o) / \varepsilon.$$

Now we use Lemma D.3 and Lemma D.4 to analyze the sampling procedure.

**Lemma D.5.** *If we set  $\alpha = C \cdot U_M / L_M \cdot \log(|\mathcal{N}| \cdot \log n / \delta_o) / \varepsilon^2$ ,  $\delta_{\text{struct}} = \delta_o / (4 \log n)$ , then for each  $1 \leq j \leq 2 \log n$ , with probability at least  $1 - \delta_o / (2 \log n)$ , simultaneously for all  $y \in \mathcal{N}$ ,*

$$\|y_{P_j}\|_{M,w'} = (1 \pm \varepsilon)\|y_{P_j}\|_{M,w}.$$

Applying a union bound over all  $1 \leq j \leq 2 \log n$ , with probability at least  $1 - \delta_o$ , simultaneously for all  $y \in \mathcal{N}$ ,

$$\|y\|_{M,w'} = (1 \pm \varepsilon)\|y\|_{M,w}.$$

*Proof.* By Theorem B.3, for each  $1 \leq j \leq 2 \log n$ , with probability  $1 - \delta_o / (4 \log n)$ , simultaneously for all  $y \in \mathcal{N} \subseteq \mathbf{im}(A)$ , if  $y$  satisfies (i)  $\|y_{L_y \cap P_j}\|_p^p \leq \alpha \cdot \tau^p$  and (ii)  $|H_y \cap P_j| \leq \alpha$ , then we have  $H_y \cap P_j \subseteq I_j$ . We condition on this event in the remaining part of the proof.

Now we consider a fixed  $y \in \mathcal{N}$ . We show that  $\|y_{P_j}\|_{M,w'} = (1 \pm \varepsilon)\|y_{P_j}\|_{M,w}$  with probability at least  $1 - \delta_o / O(|\mathcal{N}| \cdot \log n)$ . The desired bound follows by applying a union bound over all  $y \in \mathcal{N}$ .

We distinguish four cases in our analysis. We use  $T$  to denote a fixed threshold

$$T = C \cdot U_M \cdot \tau^p \cdot 2^{j-1} \cdot \log(|\mathcal{N}| \cdot \log n / \delta_o) / \varepsilon^2.$$

**Case (i):**  $\|y_{H_y \cap P_j}\|_{M,w} < T$  and  $\|y_{L_y \cap P_j}\|_{M,w} < T$ . Since  $\|y_{H_y \cap P_j}\|_{M,w} < T$ , we must have

$$|H_y \cap P_j| < C \cdot U_M / L_M \cdot \log(|\mathcal{N}| \cdot \log n / \delta_o) / \varepsilon^2 = \alpha.$$

Furthermore, we also have

$$\|y_{L_y \cap P_j}\|_p^p < C \cdot U_M / L_M \cdot \tau^p \cdot \log(|\mathcal{N}| \cdot \log n / \delta_o) / \varepsilon^2 = \alpha \cdot \tau^p.$$

By Lemma A.9, with probability at least  $1 - \delta_o / O(|\mathcal{N}| \cdot \log n)$ , we have

$$\|y_{P_j \setminus I_j}\|_{M,w'} = (1 \pm \varepsilon)\|y_{P_j \setminus I_j}\|_{M,w},$$

since  $H_y \cap P_j \subseteq I_j$ . Moreover,  $\|y_{I_j}\|_{M,w} = \|y_{I_j}\|_{M,w'}$  since  $w_i = w'_i$  for all  $i \in I_j$ . Thus, we have  $\|y_{P_j}\|_{M,w'} = (1 \pm \varepsilon)\|y_{P_j}\|_{M,w}$ .

**Case (ii):**  $\|y_{H_y \cap P_j}\|_{M,w} \geq T$  and  $\|y_{L_y \cap P_j}\|_{M,w} \geq T$ . By Lemma D.3 and Lemma D.4, with probability at least  $1 - \delta_o/O(|\mathcal{N}| \cdot \log n)$ ,

$$\|y_{H_y \cap P_j}\|_{M,w'} = (1 \pm \varepsilon/2)\|y_{H_y \cap P_j}\|_{M,w}$$

and

$$\|y_{L_y \cap P_j}\|_{M,w'} = (1 \pm \varepsilon/2)\|y_{L_y \cap P_j}\|_{M,w},$$

which implies

$$\|y_{P_j}\|_{M,w'} = (1 \pm \varepsilon/2)\|y_{P_j}\|_{M,w}.$$

**Case (iii):**  $\|y_{H_y \cap P_j}\|_{M,w} \geq T$  and  $\|y_{L_y \cap P_j}\|_{M,w} < T$ . By Lemma D.3 and Lemma D.4, with probability at least  $1 - \delta_o/O(|\mathcal{N}| \cdot \log n)$ ,

$$\|y_{H_y \cap P_j}\|_{M,w'} = (1 \pm \varepsilon/2)\|y_{H_y \cap P_j}\|_{M,w}$$

and

$$\left| \|y_{L_y \cap P_j}\|_{M,w'} - \|y_{L_y \cap P_j}\|_{M,w} \right| \leq C \cdot U_M \cdot \tau^p \cdot 2^{j-2} \cdot \log(|\mathcal{N}| \cdot \log n / \delta_o) / \varepsilon.$$

Since

$$\|y_{P_j}\|_{M,w} \geq \|y_{H_y \cap P_j}\|_{M,w} \geq T \geq C \cdot U_M \cdot \tau^p \cdot 2^{j-1} \cdot \log(|\mathcal{N}| \cdot \log n / \delta_o) / \varepsilon^2,$$

we have

$$\left| \|y_{L_y \cap P_j}\|_{M,w'} - \|y_{L_y \cap P_j}\|_{M,w} \right| \leq \varepsilon/2 \cdot \|y_{P_j}\|_{M,w},$$

which implies

$$\|y_{P_j}\|_{M,w'} = (1 \pm \varepsilon)\|y_{P_j}\|_{M,w}.$$

**Case (iv):**  $\|y_{H_y \cap P_j}\|_{M,w} < T$  and  $\|y_{L_y \cap P_j}\|_{M,w} \geq T$ . By Lemma D.3 and Lemma D.4, with probability at least  $1 - \delta_o/O(|\mathcal{N}| \cdot \log n)$ ,

$$\|y_{L_y \cap P_j}\|_{M,w'} = (1 \pm \varepsilon/2)\|y_{L_y \cap P_j}\|_{M,w}$$

and

$$\left| \|y_{H_y \cap P_j}\|_{M,w'} - \|y_{H_y \cap P_j}\|_{M,w} \right| \leq C \cdot U_M \cdot \tau^p \cdot 2^{j-2} \cdot \log(|\mathcal{N}| \cdot \log n / \delta_o) / \varepsilon.$$

Since

$$\|y_{P_j}\|_{M,w} \geq \|y_{L_y \cap P_j}\|_{M,w} \geq T \geq C \cdot U_M \cdot \tau^p \cdot 2^{j-1} \cdot \log(|\mathcal{N}| \cdot \log n / \delta_o) / \varepsilon^2,$$

we have

$$\left| \|y_{H_y \cap P_j}\|_{M,w'} - \|y_{H_y \cap P_j}\|_{M,w} \right| \leq \varepsilon/2 \cdot \|y_{P_j}\|_{M,w},$$

which implies

$$\|y_{P_j}\|_{M,w'} = (1 \pm \varepsilon)\|y_{P_j}\|_{M,w}.$$

□

Now we show that with probability  $1 - \delta_o$ , simultaneously for all  $x \in \mathbb{R}^d$ ,  $\|Ax\|_{p,w'}^p = (1 \pm \varepsilon)\|Ax\|_{p,w}^p$ .

**Lemma D.6.** For any  $1 \leq j \leq 2 \log n$ , with with probability at least  $1 - \delta_o/(2 \log n)$ , simultaneously for all  $y = Ax$ ,

$$\|y_{P_j}\|_{p,w'}^p = (1 \pm \varepsilon)\|y_{P_j}\|_{p,w}^p.$$

Applying a union bound over all  $1 \leq j \leq 2 \log n$ , this implies with probability at least  $1 - \delta_o$ ,

$$\|y\|_{p,w'}^p = (1 \pm \varepsilon)\|y\|_{p,w}^p.$$

*Proof.* For any fixed  $1 \leq j \leq 2 \log n$ , by Theorem A.10, if we take  $\delta_{\text{subspace}} = \delta_o/(2 \log n)$ , with probability at least  $1 - \delta_o/(2 \log n)$ , simultaneously for all  $y = Ax$ , we have

$$\|y_{P_j \setminus I_j}\|_{p,w'}^p = (1 \pm \varepsilon)\|y_{P_j \setminus I_j}\|_{p,w}^p.$$

Moreover,  $\|y_{I_j}\|_{p,w}^p = \|y_{I_j}\|_{p,w'}^p$  since  $w_i = w'_i$  for all  $i \in I_j$ . Thus, we have  $\|y_{P_j}\|_{p,w'}^p = (1 \pm \varepsilon)\|y_{P_j}\|_{p,w}^p$ . □

## D.2. The Recursive Algorithm

We start by setting  $w = 1^n$ . In each recursive step, we use the sampling procedure defined in Section D.1 to obtain  $w'$ , by setting  $\delta_o = \delta/O(\log n)$  and  $\varepsilon = \varepsilon'/O(\log n)$  for some  $\varepsilon' > 0$ . By Lemma D.1, for each recursive step, with probability at least  $1 - \delta/(10 \log n)$ , we have  $\|w'\|_0 \leq 2/3\|w\|_0$ . We repeat the recursive step until  $\|w\|_0 \leq 10F$ .

By applying a union bound over all recursive steps, with probability  $1 - \delta/10$ , the recursive depth is at most  $\log_{3/2} n$ . By Lemma D.2, this also implies with probability  $1 - \delta/10$ , during the whole recursive algorithm, the weight vector  $w$  always satisfies  $\|w\|_\infty \leq 2^{\log_{1.5} n} \leq n^2$ . If we use  $w_{\text{final}}$  to denote the final weight vector, then we have

$$\|w_{\text{final}}\|_0 \leq 10F = \tilde{O}(d^{\max\{1, p/2\}} \log n \cdot (\log(|\mathcal{N}|/\delta_o) \cdot \log(1/\delta_o) + d)/\varepsilon^2).$$

By Lemma D.5, and a union bound over all the  $\log_{1.5} n$  recursive depths, with probability  $1 - \delta$ , simultaneously for all  $y \in \mathcal{N}$ , we have

$$\|Ax\|_{M, w_{\text{final}}} = (1 \pm O(\varepsilon \cdot \log n)) \|Ax\|_M = (1 \pm O(\varepsilon')) \|Ax\|_M.$$

Moreover, by Lemma D.6 and a union bound over all the  $\log_{1.5} n$  recursive depths, with probability  $1 - \delta/10$ , simultaneously for all  $y = Ax$  we have

$$\|Ax\|_{p, w_{\text{final}}}^p = (1 \pm O(\varepsilon \cdot \log n)) \|Ax\|_{p, w}^p = (1 \pm O(\varepsilon')) \|Ax\|_{p, w}^p.$$

We further show that conditioned on this event, simultaneously for all  $x \in \mathbb{R}^d$ ,

$$\|Ax\|_{M, w_{\text{final}}} \geq \frac{L_M}{U_M \cdot n} \cdot \|Ax\|_M.$$

Consider a fixed vector  $x \in \mathbb{R}^d$ , if there exists a coordinate  $i \in H_{Ax}$  such that  $w_i > 0$ , since  $w_i \geq 1$  if  $w_i > 0$ , we must have

$$\|Ax\|_{M, w_{\text{final}}} \geq w_i M((Ax)_i) \geq M((Ax)_i) \geq L_M \cdot \tau^p.$$

On the other hand,

$$\|Ax\|_M \leq n \cdot U_M \cdot \tau^p,$$

which implies

$$\|Ax\|_{M, w_{\text{final}}} \geq \frac{L_M}{U_M \cdot n} \cdot \|Ax\|_M.$$

Otherwise,  $i \in L_{Ax}$  for all  $i \in [n]$ , which implies

$$\|Ax\|_{M, w_{\text{final}}} \geq L_M \cdot \|Ax\|_{p, w_{\text{final}}}^p \geq (1 - O(\varepsilon')) L_M \|Ax\|_{p, w}^p \geq \frac{(1 - O(\varepsilon')) L_M}{U_M} \|Ax\|_M.$$

Finally, since each recursive step runs in  $\tilde{O}((\text{nnz}(A) + d^{p/2+O(1)}) \cdot \log(|\mathcal{N}|/\delta) \cdot / \varepsilon^2) \cdot \log(1/\delta)$  time, and the number of recursive steps is upper bounded by  $\log_{1.5} n$  with probability  $1 - \delta/10$ , the total running time is also upper bounded  $\tilde{O}((\text{nnz}(A) + d^{p/2+O(1)}) \cdot \log(|\mathcal{N}|/\delta) \cdot / \varepsilon^2) \cdot \log(1/\delta)$  with probability  $1 - \delta/10$ .

The following lemma can be proved by applying a union bound over all observations above, changing  $\varepsilon'$  to  $\varepsilon$  and changing  $A$  to  $[A \ b]$ .

**Lemma D.7.** *The algorithm outputs a vector  $w_{\text{final}} \in \mathbb{R}^n$ , such that for any set  $\mathcal{N} \subseteq \text{im}([A \ b])$  with size  $|\mathcal{N}|$ , with probability  $1 - \delta$ , the algorithm runs in  $\tilde{O}((\text{nnz}(A) + d^{p/2+O(1)}) \cdot \log(|\mathcal{N}|/\delta) \cdot / \varepsilon^2) \cdot \log(1/\delta)$  time and the following holds:*

1.  $\|w_{\text{final}}\|_0 \leq \tilde{O}(d^{\max\{1, p/2\}} \log^3 n \cdot (\log(|\mathcal{N}|/\delta) \cdot \log(1/\delta) + d)/\varepsilon^2)$ ;
2.  $\|w_{\text{final}}\|_\infty \leq n^2$ ;
3. For all  $x \in \mathbb{R}^d$ ,  $\|Ax - b\|_{M, w_{\text{final}}} \geq \frac{L_M}{U_M \cdot n} \cdot \|Ax - b\|_M$ .
4. For all  $x \in \mathcal{N}$ ,  $\|Ax - b\|_{M, w_{\text{final}}} = (1 \pm \varepsilon) \|Ax - b\|_M$ .

Combining Lemma D.7 with the net argument in Theorem C.5, we have the following theorem.

**Theorem D.8.** *By setting  $|\mathcal{N}| = n^{O(d^3)} \cdot (1/\varepsilon)^{O(d)}$ , the algorithm outputs a vector  $w_{\text{final}} \in \mathbb{R}^n$ , such that with probability  $1 - \delta$ , the algorithm runs in  $\tilde{O}((\text{nnz}(A) + d^{p/2+O(1)})/\varepsilon^2 \cdot \log(1/\delta)) \cdot \log(1/\delta)$  time,  $\|w_{\text{final}}\|_0 \leq \tilde{O}(d^{p/2+O(1)} \log^4 n \cdot \log^2(1/\delta)/\varepsilon^2)$  and any  $C$ -approximate solution of  $\min_x \|Ax - b\|_{M, w_{\text{final}}}$  with  $C \leq \text{poly}(n)$  is a  $C \cdot (1 + \varepsilon)$ -approximate solution of  $\min_x \|Ax - b\|_M$ .*

*Proof.* Lemma D.7 implies that  $U_O = 1 + \varepsilon$ ,  $L_N = 1 - \varepsilon$ ,  $L_A = \frac{L_M}{U_M \cdot n}$  and  $U_A \leq \|w_{\text{final}}\|_\infty \leq n^2$ . Adjusting constants and applying Theorem C.5 imply the desired result.  $\square$

## E. The $M$ -sketch

In this section we give an oblivious sketch for Tukey loss functions. Throughout this section we assume  $1 \leq p \leq 2$  in Assumption 1.

For convenience and to set up notation, we first describe the construction.

**The sketch.** Each coordinate  $z_p$  of a vector  $z$  to be sketched is mapped to a level  $h_p$ , and the number of coordinates mapped to level  $h$  is exponentially small in  $h$ : for an integer branching factor  $b > 1$ , we expect the number of coordinates at level  $h$  to be about a  $b^{-h}$  fraction of the coordinates. The number of buckets at a given level is  $N = bcm$ , where integers  $m, c > 1$  are parameters to be determined later.

Our sketching matrix is  $S \in \mathbb{R}^{N h_{\max} \times n}$ , where  $h_{\max} \equiv \lfloor \log_b(n/m) \rfloor$ . Our weight vector  $w \in \mathbb{R}^{N h_{\max}}$  has entries  $w_{i+1} \leftarrow \beta b^h$ , for  $i \in [Nh, N(h+1))$  and integer  $h = 0, 1, \dots, h_{\max}$ , and  $\beta \equiv (b - b^{-h_{\max}})/(b - 1)$ . Our sketch is reminiscent of sketches in the data stream literature, where we hash into buckets at multiple levels of subsampling (Indyk & Woodruff, 2005; Verbin & Zhang, 2012). However, the estimation performed in the sketch space needs to be the same as in the original space, which necessitates a new analysis.

The entries of  $S$  are  $S_{j,p} \leftarrow \Lambda_p$ , where  $p \in [n]$  and  $j \leftarrow g_p + Nh_p$  and

$$\begin{aligned} \Lambda_p &\leftarrow \pm 1 \text{ with equal probability} \\ g_p &\in [N] \text{ chosen with equal probability} \\ h_p &\leftarrow h \text{ with probability } 1/\beta b^h \text{ for integer } h \in [0, h_{\max}], \end{aligned} \tag{4}$$

all independently. Let  $L_h$  be the multiset  $\{z_p \mid h_p = h\}$ , and  $L_{h,i}$  the multiset  $\{z_p \mid h_p = h, g_p = i\}$ ; that is,  $L_h$  is multiset of values at a given level,  $L_{h,i}$  is the multiset of values in a bucket. We can write  $\|Sz\|_{M,w}$  as  $\sum_{h \in [0, h_{\max}], i \in [N]} \beta b^h M(\|L_{h,i}\|_\Delta)$ , where  $\|L\|_\Delta$  denotes  $|\sum_{z_p \in L} \Lambda_p z_p|$ .

### E.1. Accuracy Bounds for Sketching One Vector

We will show that our sketching construction has the property that for a given vector  $z \in \mathbb{R}^n$ , with high probability,  $\|Sz\|_{M,w}$  is not too much smaller than  $\|z\|_M$ . We assume that  $\|z\|_M = 1$ , for notational convenience.

Define  $y \in \mathbb{R}^n$  by  $y_p = M(z_p)$ , so that  $\|y\|_1 = \|z\|_M = 1$ . Let  $Z$  denote the multiset comprising the coordinates of  $z$ , and let  $Y$  denote the multiset comprising the coordinates of  $y$ . For  $\hat{Z} \subset Z$ , let  $M(\hat{Z}) \subset Y$  denote  $\{M(z_p) \mid z_p \in \hat{Z}\}$ . Let  $\|Y\|_k$  denote  $\left(\sum_{y \in Y} |y|^k\right)^{1/k}$ , so  $\|Y\|_1 = \|y\|_1$ . Hereafter multisets will just be called ‘‘sets’’.

**Weight classes.** Fix a value  $\gamma > 1$ , and for integer  $q \geq 1$ , let  $W_q$  denote the multiset comprising weight class  $\{y_p \in Y \mid \gamma^{-q} \leq y_p \leq \gamma^{1-q}\}$ . We have  $\beta b^h \mathbb{E}[\|M(L_h) \cap W_q\|_1] = \|W_q\|_1$ . For a set of integers  $Q$ , let  $W_Q$  denote  $\cup_{q \in Q} W_q$ .

**Defining  $q_{\max}$  and  $h(q)$ .** For given  $\varepsilon > 0$ , consider  $y' \in \mathbb{R}^n$  with  $y'_i \leftarrow y_i$  when  $y_i > \varepsilon/n$ , and  $y'_i \leftarrow 0$  otherwise. Then  $\|y'\|_1 \geq 1 - n(\varepsilon/n) = 1 - \varepsilon$ . We can neglect  $W_q$  for  $q > q_{\max} \equiv \log_\gamma(n/\varepsilon)$ , up to error  $\varepsilon$ . Moreover, we can assume that  $\|W_q\|_1 \geq \varepsilon/q_{\max}$ , since the contribution to  $\|y\|_1$  of weight classes  $W_q$  of smaller total weight, added up for  $q \leq q_{\max}$ , is at most  $\varepsilon$ .



Let  $h(q)$  denote  $\lfloor \log_b(|W_q|/\beta m) \rfloor$  for  $|W_q| \geq \beta m$ , and zero otherwise, so that

$$m \leq \mathbb{E}[|M(L_{h(q)}) \cap W_q|] \leq bm$$

for all  $W_q$  except those with  $|W_q| < \beta m$ , for which the lower bound does not hold.

Since  $|W_q| \leq n$  for all  $q$ , we have  $h(q) \leq \lfloor \log_b(n/\beta m) \rfloor \leq h_{\max}$ .

## E.2. Contraction Bounds

Here we will show that  $\|S_z\|_{M,w}$  is not too much smaller than  $\|z\|_M$ . We will need some weak conditions among the parameters. Recall that  $N = bcm$ .

**Assumption 3.** We will assume  $b \geq m$ ,  $b > c$ ,  $m = \Omega(\log \log(n/\varepsilon))$ ,  $\log b = \Omega(\log \log(n/\varepsilon))$ ,  $\gamma \geq 2 \geq \beta$ , an error parameter  $\varepsilon \in [1/10, 1/3]$ , and  $\log N \leq \varepsilon^2 m$ . We will consider  $\gamma$  to be fixed throughout, that is, not dependent on the other parameters.

We need lemmas that allow lower bounds on the contributions of the weight classes. First, some notation. For  $h = 0, 1, \dots, h_{\max}$ , let

$$\begin{aligned} M_{<} &\equiv \log_\gamma(m/\varepsilon) = O(\log_\gamma(b/\varepsilon)) \\ Q_{<} &\equiv \{q \mid |W_q| < \beta m, q \leq M_{<}\} \\ \hat{Q}_h &\equiv \{q \mid h(q) = h, |W_q| \geq \beta m\} \\ M_{\geq} &\equiv \log_\gamma(2(1+3\varepsilon)b/\varepsilon) \\ Q_h &\equiv \{q \in \hat{Q}_h \mid q \leq M_{\geq} + \min_{q \in \hat{Q}_h} q\} \\ Q^* &\equiv Q_{<} \cup [\cup_h Q_h]. \end{aligned} \tag{5}$$

Here  $Q_{<}$  is the set of indices of weight classes that have relatively few members, but contain relatively large weights.  $\hat{Q}_h$  gives the indices of  $W_q$  that are ‘‘large’’ and have  $h$  as the level at which between  $m$  and  $bm$  members of  $W_q$  are expected in  $L_h$ . The set  $Q_h$  cuts out the weight classes that can be regarded as negligible at level  $h$ .

**Lemma E.1.** If  $N \geq \max\{O(|M_{<}|dm^3\varepsilon), \tilde{O}(d^2m^2/\varepsilon^2)\}$ , then with constant probability, for all  $z \in \mathbf{im}(A)$  and all  $q \in Q_{<}$ , the following event  $\mathcal{E}_v$  holds: there are sets  $W_q^* \subset W_q$ , with  $|W_q^*| \geq (1-\varepsilon)|W_q|$ , such that for all  $y \in W_q^*$ ,

1. they are isolated: they are the sole members of  $W_{Q_{<}}$  in their bucket;
2. their buckets are low-weight: the set  $L$  of other entries in bucket containing  $y \in W_q^*$  has  $\|L\|_1 \leq 1/\varepsilon^2 m^3$ .

*Proof.* Without loss of generality we assume  $h(q)$  are the same for all  $q \in M_{<}$ , since otherwise we can deal with each  $h(q)$  separately.

Let  $\alpha = m/(L_M \cdot \varepsilon)$ . By Lemma B.4, there exists a set  $I \subseteq [n]$  with size  $|I| = \tilde{O}(d \cdot \alpha) = \tilde{O}(d \cdot m/\varepsilon)$  such that for any  $z \in \mathbf{im}(A)$ , if  $z$  satisfies (i)  $\|z_{L_z}\|_p^p \leq \alpha \cdot \tau^p$  and (ii)  $|H_z| \leq \alpha$ , then  $H_z \subseteq I$ . Let  $\{u\}_{i \in [n] \setminus I}$  be the  $\ell_p$  Lewis weights of  $A_{[n] \setminus I, *}$  and let  $J \subseteq [n] \setminus I$  be the set of indices of the  $d \cdot m/\varepsilon \cdot U_M/L_M$  largest coordinates of  $u$ . Thus,  $|J| \leq O(d \cdot m/\varepsilon)$ . Since  $J$  contains the  $d \cdot m/\varepsilon \cdot U_M/L_M$  largest coordinates of  $u$  and

$$\sum_{i \in [n] \setminus I} u_i = \sum_{i \in [n] \setminus I} \bar{u}_i^p \leq d$$

by Theorem A.5, for each  $i \in [n] \setminus (I \cup J)$ , we have  $u_i \leq d/(d \cdot m/\varepsilon \cdot U_M/L_M) \leq \varepsilon/m \cdot L_M/U_M$ .

If  $\tau^p < \|z\|_M \cdot \varepsilon/m$ , by Assumption 1.2, we have  $M(z_i) \leq \tau^p < \|z\|_M \cdot \varepsilon/m$  for all  $i \in [n]$ . In this case, we have  $W_{Q_{<}} = \emptyset$ . Thus we assume  $\tau^p \geq \|z\|_M \cdot \varepsilon/m$  in the remaining part of the analysis.

Since  $\|z\|_M \geq |H_z| \cdot \tau^p$ , we have  $|H_z| \leq m/\varepsilon$ . Furthermore, by Assumption 1.4,  $\|z_{L_z}\|_p^p \leq \|z_{L_z}\|_M/L_M \leq \|z\|_M/L_M \leq \tau^p \cdot m/(L_M \cdot \varepsilon)$ . Thus by setting  $\alpha = m/(L_M \cdot \varepsilon)$  we have  $H_z \subseteq I$ . For each  $i \in [n] \setminus I$ , we have  $|z_i| \leq \tau$ . By Lemma

A.8 and Assumption 1.4, for each  $i \in [n] \setminus I$ ,  $M(z_i) \leq |z_i|^p/L_M \leq u_i \cdot \|z_{[n] \setminus I}\|_M^p/L_M \leq u_i \cdot \|z_{[n] \setminus I}\|_M \cdot U_M/L_M < u_i \cdot \|z\|_M \cdot U_M/L_M$ . Thus for each entry  $i \in [n] \setminus (I \cup J)$ , we have  $M(z_i) < \varepsilon/m \cdot \|z\|_M$ .

Thus, the indices of all members of  $W_{Q_{<}}$  are in  $I \cup J$ . By setting  $N \geq |I \cup J|^2/\kappa = \tilde{O}(d^2m^2/\varepsilon^2)/\kappa$ , the expected number of total collisions in  $I \cup J$  is  $|I \cup J|^2/N \leq \kappa$ . Thus, by Markov's inequality, with probability  $1 - 2\kappa$ , the total number of collisions is upper bounded by  $1/2$ , i.e., there is no collision. This implies the first condition.

For the second condition, we use  $\{u_i\}_{i \in [n] \setminus (I \cup J)}$  to denote the  $\ell_p$  Lewis weights of  $A_{i \in [n] \setminus (I \cup J), *}$ . Consider a fixed  $q \in M_{<}$ . By the first condition, all elements in  $W_q$  are the sole members of  $W_{Q_{<}}$  in their buckets. For each bucket we define  $B_{h,i}$  to be the multiset  $\{u_p \mid h_p = h, g_p = i, p \in [n] \setminus (I \cup J)\}$ . By setting  $N \geq \frac{U_M \cdot |M_{<}| \cdot dm^3 \varepsilon}{L_M \cdot \kappa}$ , for each  $y \in W_q$ ,  $\mathbb{E}[\|B_{h,i}\|_1] \leq d/N \leq \frac{L_M}{U_M} \cdot \frac{1}{\varepsilon^2 m^3} \cdot \frac{\varepsilon \cdot \kappa}{|M_{<}|}$  where  $L_{h,i}$  is the bucket that contains  $y$ . This is simply because  $\sum_{i \in N} B_{h,i} \leq \sum_{i \in [n] \setminus (I \cup J)} u_i \leq d$  by Theorem A.5. We say a bucket is *good* if  $\|B_{h,i}\|_1 \leq \frac{L_M}{U_M} \cdot \frac{1}{\varepsilon^2 m^3}$ . Notice that for  $y \in W_q$ , if  $y$  is in a good bucket  $B_{h,i}$ , then the set  $L$  of other entries in that bucket satisfies

$$\begin{aligned}
 \|L\|_1 &= \sum_{y \in L} y \\
 &= \sum_{p \in [n] \setminus (I \cup J) | h_p = h, g_p = i} M(z_p) \\
 &\leq \sum_{p \in [n] \setminus (I \cup J) | h_p = h, g_p = i} U_M \cdot |z_p|^p && \text{(Assumption 1.4)} \\
 &\leq \sum_{p \in [n] \setminus (I \cup J) | h_p = h, g_p = i} U_M \cdot u_p \cdot \|z_{[n] \setminus (I \cup J)}\|_M^p && \text{(Lemma A.8)} \\
 &\leq \sum_{p \in [n] \setminus (I \cup J) | h_p = h, g_p = i} U_M/L_M \cdot u_p \cdot \|z_{[n] \setminus (I \cup J)}\|_M && \text{(Assumption 1.4)} \\
 &\leq \|B_{h,i}\|_1 \cdot U_M/L_M \cdot \|z\|_M \\
 &\leq \frac{1}{\varepsilon^2 m^3} \cdot \|z\|_M.
 \end{aligned}$$

Thus, it suffices to show that at least  $(1 - \varepsilon)|W_q|$  buckets associated with  $y \in W_q$  are good.

By Markov's inequality, for each  $y \in W_q$ , with probability  $1 - \varepsilon \cdot \kappa/|M_{<}|$ , the bucket that contains  $y$  is good. Thus, for the  $|W_q|$  buckets associated with  $y \in W_q$ , the expected number of good buckets is at least  $(1 - \varepsilon \cdot \kappa/|M_{<}|)|W_q|$ . Again, by Markov's inequality, with probability at least  $1 - \kappa/|M_{<}|$ , at least  $(1 - \varepsilon)|W_q|$  buckets associated with  $y \in W_q$  are good, and we just take these  $(1 - \varepsilon)|W_q|$  good buckets to be  $W_q^*$ . By applying a union bound over all  $q \in M_{<}$ , the second condition holds with probability at least  $1 - \kappa$ . The lemma follows by applying a union bound over the two conditions and setting  $\kappa$  to be a small constant.  $\square$

**Lemma E.2** (Lemma 3.8 of (Clarkson & Woodruff, 2015b)). *Let  $Q'_h \equiv \{q \mid q \leq M'_h\}$ , where  $M'_h \equiv \log_\gamma(\beta b^{h+1} m^2 q_{\max})$ . Then for large enough  $N = O(m^2 b \varepsilon^{-1} q_{\max})$ , with probability at least  $1 - C^{-\varepsilon^2 m}$  for a constant  $C > 1$ , for each  $q \in \cup_h Q'_h$ , there is  $W_q^* \subset L_{h(q)} \cap W_q$  such that:*

1.  $|W_q^*| \geq (1 - \varepsilon)\beta^{-1}b^{-h(q)}|W_q|$ .
2. each  $x \in W_q^*$  is in a bucket with no other member of  $W_{Q^*}$ .
3.  $\|W_q^*\|_1 \geq (1 - 4\gamma\varepsilon)\beta^{-1}b^{-h}\|W_q\|_1$ .
4. each  $x \in W_q^*$  is in a bucket with no member of  $W_{Q'_h}$ .

For  $v \in T \subset Z$ , let  $T - v$  denote  $T \setminus \{v\}$ .

**Lemma E.3** (Lemma 3.6 of (Clarkson & Woodruff, 2015b)). For  $v \in T \subset Z$ ,

$$M(\|T\|_\Lambda) \geq \left(1 - \frac{\|T - v\|_\Lambda}{|v|}\right)^2 M(v),$$

and if  $M(v) \geq \varepsilon^{-1}\|T - v\|_M$ , then

$$\frac{\|T - v\|_2}{|v|} \leq \varepsilon^{1/2}, \quad (6)$$

and for a constant  $C$ ,  $\mathbb{E}_\Lambda[M(\|T\|_\Lambda)] \geq (1 - C\varepsilon^{1/2})M(v)$ .

**Lemma E.4** (Lemma 3.9 of (Clarkson & Woodruff, 2015b)). Assume Assumption 3. There is  $N = O(\varepsilon^{-2}m^2bq_{\max})$ , so that for all  $0 \leq h \leq h_{\max}$  and  $q \in Q_h$  with  $\|W_q\|_1 \geq \varepsilon/q_{\max}$ , we have

$$\sum_{y_p \in W_q^*} M(\|L(y_p)\|_\Lambda) \geq (1 - \varepsilon^{1/2})\|W_q\|_1$$

with failure probability at most  $C^{-\varepsilon^2 m}$  for fixed  $C > 1$ .

**Lemma E.5.** Assume that  $\mathcal{E}_v$  of Lemma E.1 holds, and Assumption 3. Then for  $q \in Q_<$ ,

$$\sum_{y_p \in W_q^*} M(\|L(y_p)\|_\Lambda) \geq (1 - \varepsilon^{1/2})\|W_q\|_1$$

with failure probability at most  $C^{-\varepsilon^2 m}$  for a constant  $C > 1$ .

*Proof.* Let  $v \equiv z_p$  where  $y_p = M(z_p)$ , let  $L(v)$  denote the  $\{z_{p'} \mid M(z_{p'}) \in L\}$ . Condition  $\mathcal{E}_v$  and  $M(v) \geq \varepsilon/m$  imply that

$$\|L(v) - v\|_2^2 \leq \|L\|_1 \leq 1/\varepsilon^2 m^3 < M(v)/\varepsilon m,$$

so that using (6) we have

$$\frac{\|L(v) - v\|_2^2}{|v|^2} \leq \frac{\|L(v) - v\|_M}{M(v)} \leq \frac{1}{\varepsilon m}. \quad (7)$$

Since  $\|L\|_\infty \leq \|L\|_1$ , we also have, for all  $v' \in L(v) - v$ , and using again  $M(v) \geq \varepsilon/m$ ,

$$\left|\frac{v'}{v}\right| \leq \left(\frac{M(v')}{M(v)}\right)^{1/2} \leq \frac{1}{m\varepsilon^{3/2}}. \quad (8)$$

From (8), we have that the summands determining  $\|L(v) - v\|_\Lambda$  have magnitude at most  $|v|\varepsilon^{1/2}/\varepsilon^2 m$ . From (7), we have  $\|L(v) - v\|_2^2$  is at most  $v^2\varepsilon/\varepsilon^2 m$ . It follows from Bernstein's inequality that with failure probability  $\exp(-\varepsilon^2 m)$ ,  $\|L(v) - v\|_\Lambda \leq \varepsilon^{1/2}|v|$ . Applying the first claim of Lemma E.3, we have  $M(\|L(v)\|_\Lambda) \geq (1 - 2\varepsilon^{1/2})M(v)$ , for all  $v \in M^{-1}(W_q^*)$  with failure probability  $\beta m M_< \exp(-\varepsilon^2 m)$ . Summing over  $W_q^*$ , we have

$$\sum_{v \in M^{-1}(W_q^*)} M(\|L(v)\|_\Lambda) \geq (1 - \varepsilon^{1/2})\|W_q^*\|_1 \geq (1 - 2\varepsilon\gamma)(1 - \varepsilon^{1/2})\|W_q\|_1.$$

This implies the bound, using Assumption 3, after adjusting constants.  $\square$

The above lemmas imply that overall, with high probability, the sketching-based estimate of  $\|z\|_M$  of a single given vector  $z$  is very likely to not much smaller than  $\|z\|_M$ , as stated next.

**Theorem E.6** (Theorem 3.2 of (Clarkson & Woodruff, 2015b)). Assume Assumption 3, and condition  $\mathcal{E}_v$  of Lemma E.1. Then  $\|Sz\|_{M,w} \geq \|z\|_M(1 - \varepsilon^{1/2})$ , with failure probability no more than  $C^{-\varepsilon^2 m}$ , for an absolute constant  $C > 1$ .

### E.3. A ‘‘Clipped’’ Version

For a vector  $z$ , we use  $\|Sz\|_{M_{c,w}}$  to denote a ‘‘clipped’’ version of  $\|Sz\|_{M,w}$ , in which we ignore small buckets and use a subset of the coordinates of  $Sz$  as follows:  $\|Sz\|_{M_{c,w}}$  is obtained by adding in only those buckets in level  $h$  that are among the top

$$M^* \equiv bmM_{\geq} + \beta m M_{<}$$

in  $\|L_{h,i}\|_{\Lambda}$ , recalling  $M_{\geq}$  and  $M_{<}$  defined in (5). Formally, we define  $\|Sz\|_{M_{c,w}}$  to be

$$\|Sz\|_{M_{c,w}} = \sum_{h \in [0, h_{\max}], i \in [M^*]} \beta b^h M(\|L_{h,(i)}\|_{\Lambda}),$$

where  $L_{h,(i)}$  denotes the level  $h$  bucket with the  $i$ -th largest  $\|L_{h,i}\|_{\Lambda}$  among all the level  $h$  buckets.

The proof of the contraction bound of  $\|Sz\|_{M,w}$  in Theorem E.6 requires only lower bounds on  $M(\|L_{h,i}\|_{\Lambda})$  for those at most  $M^*$  buckets on level  $h$ . Thus, the proven contraction bounds continue to hold for  $\|Sz\|_{M_{c,w}}$ , and in particular  $\|Sz\|_{M_{c,w}} \geq (1 - \varepsilon)\|Sz\|_{M,w}$ .

### E.4. Dilation Bounds

We use two prior bounds of (Clarkson & Woodruff, 2015b) on dilation; the first shows that the dilation is at most  $O(\log n)$  in expectation, while the second shows that the ‘‘clipped’’ version gives  $O(1)$  dilation with constant probability. Note that we need only expectations, since we need the dilation bound to hold only for the optimal solution as in Theorem C.5.

**Theorem E.7** (Theorem 3.3 of (Clarkson & Woodruff, 2015b)).  $\mathbb{E}[\|Sz\|_{M,w}] = O(h_{\max})\|z\|_M$ .

Better dilation is achieved by using the ‘‘clipped’’ version  $\|Sz\|_{M_{c,w}}$ , as described in (Clarkson & Woodruff, 2015b).

**Theorem E.8** (Theorem 3.4 of (Clarkson & Woodruff, 2015b)). *There is  $c = O(\log_{\gamma}(b/\varepsilon)(\log_b(n/m)))$  and  $b \geq c$ , recalling  $N = mbc$ , such that*

$$\mathbb{E}[\|Sz\|_{M_{c,w}}] \leq C\|z\|_M$$

for a constant  $C$ .

### E.5. Regression Theorem

**Lemma E.9.** *There is  $N = O(d^2 h_{\max})$ , so that with constant probability, simultaneously for all  $x \in \mathbb{R}^d$ ,*

$$0.9/(n \cdot U_M/L_M)\|Ax - b\|_M \leq \|S(Ax - b)\|_{M,w} \leq U_M/L_M \cdot n^2 \cdot \|Ax - b\|_M.$$

*Proof.* For the upper bound,

$$\|Sz\|_{M,w} = \sum_{h \in [0, h_{\max}], i \in [N]} \beta b^h M(\|L_{h,i}\|_{\Lambda}).$$

The weights  $\beta b^h$  are less than  $n$ , and

$$\begin{aligned} & M(\|L_{h,i}\|_{\Lambda}) \\ & \leq M(\|L_{h,i}\|_1) \\ & \leq M(n^{1-1/p}\|L_{h,i}\|_p) && \text{(Assumption 1.2)} \\ & \leq U_M \cdot n^{p-1}\|L_{h,i}\|_p^p && \text{(Assumption 1.4)} \\ & \leq U_M/L_M \cdot n \cdot \sum_{z_p \in L_{h,i}} M(z_p). && \text{(Assumption 1.4)} \end{aligned}$$

Since any given  $z_p$  contributes once to  $\|Sz\|_{M,w}$ ,  $\|Sz\|_{M,w} \leq U_M/L_M \cdot n^2 \cdot \|z\|_M$ .

For the lower bound, notice that

$$\|Sz\|_{2,w}^2 = \sum_{h \in [0, h_{\max}], i \in [N]} \beta b^h \|L_{h,i}\|_{\Lambda}^2.$$

For each  $h \in [0, h_{\max}]$ , since  $N = O(d^2 h_{\max})$ , with probability at least  $1 - 1/(10h_{\max})$ , simultaneously for all  $z \in \mathbf{im}(A)$  we have

$$\sum_{i \in [N]} \|L_{h,i}\|_{\Lambda}^2 = (1 \pm 0.1) \sum_{z_p \in L_h} z_p^2,$$

since the summation on the left-hand side can be equivalently viewed as applying **CountSketch** (Clarkson & Woodruff, 2013; Nelson & Nguyen, 2012; Meng & Mahoney, 2012) on  $L_h$ . Thus, by applying union bound over all  $h \in [0, h_{\max}]$ , we have

$$\|Sz\|_{2,w}^2 = \sum_{h \in [0, h_{\max}], i \in [N]} \beta b^h \|L_{h,i}\|_{\Lambda}^2 \geq 0.9 \|z\|_2^2. \quad (9)$$

If there exists some  $i \in H_{Sz}$ , since  $w_i \geq 1$  for all  $i$ , we have

$$\|Sz\|_{M,w} \geq w_i M((Sz)_i) \geq M((Sz)_i) \geq \tau^p.$$

On the other hand,

$$\|z\|_M \leq n \cdot U_M \cdot \tau^p,$$

which implies

$$\|Sz\|_{M,w} \geq \|z\|_M / (n \cdot U_M).$$

If  $H_{Sz} = \emptyset$ , then

$$\begin{aligned} & \|Sz\|_{M,w} \\ & \geq \sum_i w_i |(Sz)_i|^p \cdot L_M && \text{(Assumption 1.4)} \\ & = \|Sz\|_{p,w}^p \cdot L_M \\ & \geq \|Sz\|_{2,w}^p \cdot L_M && (p \leq 2) \\ & \geq 0.9 \|z\|_2^p \cdot L_M && (9) \\ & \geq 0.9 \|z\|_p^p \cdot L_M / n \\ & \geq 0.9 \|z\|_M / (n \cdot U_M / L_M). && \text{(Assumption 1.4)} \end{aligned}$$

□

The following theorem states that  $M$ -sketches can be used for Tukey regression, under the conditions described above.

**Theorem E.10.** *Under Assumption 1 and Assumption 2, there is an algorithm running in  $O(\text{nnz}(A))$  time, that with constant probability creates a sketched regression problem  $\min_x \|S(Ax - b)\|_{M,w}$  where  $SA$  and  $Sb$  have  $\text{poly}(d \log n)$  rows, and any  $C$ -approximate solution  $\tilde{x}$  of  $\min_x \|S(Ax - b)\|_{M,w}$  with  $C \leq \text{poly}(n)$  satisfies*

$$\|A\tilde{x} - b\|_M \leq O(C \cdot \log_d n) \min_{x \in \mathbb{R}^d} \|Ax - b\|_M.$$

Moreover, any  $C$ -approximate solution  $\hat{x}$  of  $\min_x \|S(Ax - b)\|_{M,c,w}$  with  $C \leq \text{poly}(n)$  satisfies

$$\|A\hat{x} - b\|_M \leq O(C) \min_{x \in \mathbb{R}^d} \|Ax - b\|_M.$$

*Proof.* We set  $S$  to be an  $M$ -sketch matrix with large enough  $N = \text{poly}(d \log n)$ . We note that, up to the trivial scaling by  $\beta$ ,  $SA$  satisfies Assumption 2 if  $A$  does. We also set  $m = O(d^3 \log n)$ , and  $\varepsilon = 1/10$ . We apply Theorem C.5 to prove the desired result.

The given  $N$  is large enough for Theorem E.6 and Lemma E.9 to apply, obtaining a contraction bound with failure probability  $C_1^{-m}$ . By Theorem E.6, since the needed contraction bound holds for all members of  $\mathcal{N}_{\text{poly}(\varepsilon \cdot \tau/n)} \cup \mathcal{M}_{\text{poly}(\varepsilon/n)}^{c,c,\text{poly}(n)}$ , with failure probability  $n^{O(d^3)} C_1^{-m} < 1$ , for  $m = O(d^3 \log n)$ , assuming the condition  $\mathcal{E}_v$ .

Thus, by Theorem E.7, we have  $U_O \leq O(\log_d n)$ . By Lemma E.9,  $L_A = 0.9/(n \cdot U_M/L_M)$  and  $U_A = U_M/L_M \cdot n^2$ . By Theorem E.6,  $L_N = 1 - \varepsilon^{1/2} = \Omega(1)$ . Thus, by Theorem C.5 we have

$$\|A\tilde{x} - b\|_M \leq O(C \cdot \log_d n) \min_{x \in \mathbb{R}^d} \|Ax - b\|_M.$$

A similar argument holds for  $C$ -approximate solution  $\hat{x}$  of  $\min_x \|S(Ax - b)\|_{M_{c,w}}$ . □

## F. Hardness Results and Provable Algorithms for Tukey Regression

### F.1. Hardness Results

In this section, we prove hardness results for Tukey regression based on the *Exponential Time Hypothesis* (Impagliazzo & Paturi, 2001). We first state the hypothesis.

**Conjecture 1** (Exponential Time Hypothesis (Impagliazzo & Paturi, 2001)). *For some constant  $\delta > 0$ , no algorithm can solve 3-SAT on  $n$  variables and  $m = O(n)$  clauses correctly with probability at least  $2/3$  in  $O(2^{\delta n})$  time.*

Using Dinur's PCP Theorem (Dinur, 2007), Hypothesis 1 implies a hardness result for MAX-3SAT.

**Theorem F.1** ((Dinur, 2007)). *Under Hypothesis 1, for some constant  $\varepsilon > 0$  and  $c > 0$ , no algorithm can, given a 3-SAT formula on  $n$  variables and  $m = O(n)$  clauses, distinguish between the following cases correctly with probability at least  $2/3$  in  $2^{n/\log^c n}$  time:*

- *There is an assignment that satisfies all clauses in  $\phi$ ;*
- *Any assignment can satisfy at most  $(1 - \varepsilon)m$  clauses in  $\phi$ .*

We make the following assumptions on the loss function  $M : \mathbb{R} \rightarrow \mathbb{R}^+$ . Notice that the following assumptions are more general than those in Assumption 1.

**Assumption 4.** *There exist real numbers  $\tau \geq 0$  and  $C > 0$  such that*

1.  $M(x) = C$  for all  $|x| \geq \tau$ .
2.  $0 \leq M(x) \leq C$  for all  $|x| \leq \tau$ .
3.  $M(0) = 0$ .

Now we give an reduction that transforms a 3-SAT formula  $\phi$  with  $d$  variables and  $m = O(d)$  clauses to a Tukey regression instance

$$\min_x \|Ax - b\|_M,$$

such that  $A \in \mathbb{R}^{n \times d}$  and  $b \in \mathbb{R}^n$  with  $n = O(d)$ , and all entries in  $A$  are in  $\{0, +1, -1\}$  and all entries in  $b$  are in  $\{\pm k\tau \mid k \in \mathbb{N}, k \leq O(1)\}$ . Furthermore, there are at most three non-zero entries in each row of  $A$ .

For each variable  $v_i$  in the formula  $\phi$ , there is a variable  $x_i$  in the Tukey regression that corresponds to  $v_i$ . For each variable  $v_i$ , if  $v_i$  appears in  $\Gamma_i$  clauses in  $\phi$ , we add  $2\Gamma_i$  rows into  $[A \ b]$ . These  $2\Gamma_i$  rows are chosen such that when calculating  $\|Ax - b\|_M$ , there are  $\Gamma_i$  terms of the form  $M(x_i)$ , and another  $\Gamma_i$  terms of the form  $M(x_i - 10\tau)$ . This can be done by taking the  $i$ -th entry of the corresponding row of  $A$  to be 1 and taking the corresponding entry of  $b$  to be either 0 or  $10\tau$ . Since  $\sum_{i=1}^d \Gamma_i = 3m$  in a 3-SAT formula  $\phi$ , we have added  $6m = O(d)$  rows into  $[A \ b]$ . We call these rows Part I of  $[A \ b]$ .

Now for each clause  $\mathcal{C} \in \phi$ , we add three rows into  $[A \ b]$ . Suppose the three variables in  $\mathcal{C}$  are  $v_i, v_j$  and  $v_k$ . The first row is chosen such that when calculating  $\|Ax - b\|_M$ , there is a term of the form  $M(a + b + c - 10\tau)$ , where  $a = x_i$  if there is a positive literal that corresponds to  $v_i$  in  $\mathcal{C}$  and  $a = 10\tau - x_i$  if there is a negative literal that corresponds to  $v_i$  in  $\mathcal{C}$ . Similarly,  $b = x_j$  if there is a positive literal that corresponds to  $v_j$  in  $\mathcal{C}$  and  $b = 10\tau - x_j$  if there is a negative literal that corresponds to  $v_j$  in  $\mathcal{C}$ . The same holds for  $c, x_k$ , and  $v_k$ . The second and the third row are designed such that when calculating  $\|Ax - b\|_M$ , there is a term of the form  $M(a + b + c - 20\tau)$  and another term of the form  $M(a + b + c - 30\tau)$ .

Clearly, this can also be done while satisfying the constraint that all entries in  $A$  are in  $\{0, +1, -1\}$  and all entries in  $b$  are in  $\{\pm k\tau \mid k \in \mathbb{N}, k \leq O(1)\}$ . We have added  $3m$  rows into  $[A \ b]$ . We call these rows Part II of  $[A \ b]$ .

This finishes our construction, with  $6m + 3m = O(d)$  rows in total. It also satisfies all the restrictions mentioned above.

Now we show that when  $\phi$  is satisfiable, if we are given any solution  $\bar{x}$  such that

$$\|A\bar{x} - b\|_M \leq (1 + \eta) \min_x \|Ax - b\|_M,$$

then we can find an assignment to  $\phi$  that satisfies at least  $(1 - 5\eta)m$  clauses.

We first show that when  $\phi$  is satisfiable, the regression instance we constructed satisfies

$$\min_x \|Ax - b\|_M \leq 5C \cdot m.$$

We show this by explicitly constructing a vector  $x$ . For each variable  $v_i$  in  $\phi$ , if  $v_i = 0$  in the satisfiable assignment, then we set  $x_i$  to be 0. Otherwise, we set  $x_i$  to be  $10\tau$ . For each variable  $v_i$ , since  $x_i \in \{0, 10\tau\}$ , for all the  $2\Gamma_i$  rows added for it, there will be  $\Gamma_i$  rows contributing 0 when calculating  $\|Ax - b\|_M$ , and another  $\Gamma_i$  rows contributing  $C$  when calculating  $\|Ax - b\|_M$ . The total contribution from this part will be  $3C \cdot m$ . For each clause  $\mathcal{C} \in \phi$ , for the three rows added for it, there will be one row contributing 0 when calculating  $\|Ax - b\|_M$ , and another two rows contributing  $C$  when calculating  $\|Ax - b\|_M$ . This is by construction of  $[A \ b]$  and by the fact that  $\mathcal{C}$  is satisfied. Notice that  $M(a + b + c - 10\tau) = 0$  if only one literal in  $\mathcal{C}$  is satisfied,  $M(a + b + c - 20\tau) = 0$  if two literals are satisfied, and  $M(a + b + c - 30\tau) = 0$  if all three literals in  $\mathcal{C}$  are satisfied. Thus, we must have  $\min_x \|Ax - b\|_M \leq 5C \cdot m$ , which implies  $\|A\bar{x} - b\|_M \leq (1 + \eta)5C \cdot m$ .

We first show that we can assume each  $\bar{x}_i$  satisfies  $\bar{x}_i \in [-\tau, \tau]$  or  $\bar{x}_i \in [9\tau, 11\tau]$ . This is because we can set  $\bar{x}_i = 0$  otherwise without increasing  $\|A\bar{x} - b\|_M$ , as we will show immediately. For any  $\bar{x}_i$  that is not in the two ranges mentioned above, its contribution to  $\|A\bar{x} - b\|_M$  in Part I is at least  $C \cdot 2\Gamma_i$ . However, by setting  $\bar{x}_i = 0$ , its contribution to  $\|A\bar{x} - b\|_M$  in Part I will be at most  $C \cdot \Gamma_i$ . Thus, by setting  $\bar{x}_i = 0$  the total contribution to  $\|A\bar{x} - b\|_M$  in Part I has been decreased by at least  $C \cdot \Gamma_i$ . Now we consider Part II of the rows in  $[A \ b]$ . The contribution to  $\|A\bar{x} - b\|_M$  of all rows in  $[A \ b]$  created for clauses that do not contain  $v_i$  will not be affected after changing  $\bar{x}_i$  to be 0. For the  $3\Gamma_i$  rows in  $[A \ b]$  created for clauses that contain  $v_i$ , their contribution to  $\|A\bar{x} - b\|_M$  is lower bounded by  $C \cdot 2\Gamma_i$  and upper bounded by  $C \cdot 3\Gamma_i$ . The lower bound follows since for any three real numbers  $a, b$  and  $c$ , at least two elements in  $\{a + b + c - 10\tau, a + b + c - 20\tau, a + b + c - 30\tau\}$  have absolute value at least  $\tau$ , and  $M(x) = C$  for all  $|x| \geq \tau$ . Thus, by setting  $\bar{x}_i = 0$  the total contribution to  $\|A\bar{x} - b\|_M$  in Part II will be increased by at most  $C \cdot \Gamma_i$ , which implies we can set  $\bar{x}_i = 0$  without increasing  $\|A\bar{x} - b\|_M$ .

Now we show how to construct an assignment to the 3-SAT formula  $\phi$  which satisfies at least  $(1 - 5\eta)m$  clauses, using a vector  $\bar{x} \in \mathbb{R}^d$  which satisfies (i)  $\|A\bar{x} - b\|_M \leq (1 + \eta)5C \cdot m$  and (ii)  $\bar{x}_i \in [-\tau, \tau]$  or  $\bar{x}_i \in [9\tau, 11\tau]$  for all  $\bar{x}_i$ . We set  $v_i = 0$  if  $\bar{x}_i \in [-\tau, \tau]$  and set  $v_i = 1$  if  $\bar{x}_i \in [9\tau, 11\tau]$ . To count the number of clauses satisfied by the assignment, we show that for each clause  $\mathcal{C} \in \phi$ ,  $\mathcal{C}$  is satisfied whenever  $a + b + c \geq 7\tau$ . Recall that  $a = x_i$  if there is a positive literal that corresponds to  $v_i$  in  $\mathcal{C}$  and  $a = 10\tau - x_i$  if there is a negative literal that corresponds to  $v_i$  in  $\mathcal{C}$ . Similarly,  $b = x_j$  if there is a positive literal that corresponds to  $v_j$  in  $\mathcal{C}$  and  $b = 10\tau - x_j$  if there is a negative literal that corresponds to  $v_j$  in  $\mathcal{C}$ . The same holds for  $c, x_k$ , and  $v_k$ . Since  $a, b$  and  $c$  are all in the range  $[-\tau, \tau]$  or in the range  $[9\tau, 11\tau]$ , whenever  $a + b + c \geq 7\tau$ , we must have  $a \geq 9\tau, b \geq 9\tau$  or  $c \geq 9\tau$ , in which case clause  $\mathcal{C}$  will be satisfied. Thus, at least  $(1 - 5\eta)m$  clauses will be satisfied, since otherwise  $\|A\bar{x} - b\|_M$  will be larger than  $3C \cdot m + 2C \cdot m + 5\eta C \cdot m = (1 + \eta)5C \cdot m$ . Here the first term  $3C \cdot m$  corresponds to the contribution from Part I, since any  $\bar{x}_i$  must satisfy  $|\bar{x}_i| \geq \tau$  or  $|\bar{x}_i - 10\tau| \geq \tau$ . The second and the third term  $2C \cdot m + 5\eta C \cdot m$  corresponds to the contribution from Part II when at least  $5\eta m$  clauses are not satisfied.

Our reduction implies the following theorem.

**Theorem F.2.** *Suppose there is an algorithm that runs in  $T(d)$  time and succeeds with probability  $2/3$  for Tukey regression with approximation ratio  $1 + \eta$  when the loss function  $M$  satisfies Assumption 4 and the input data satisfies the following restrictions:*

1.  $A \in \mathbb{R}^{n \times d}$  and  $b \in \mathbb{R}^n$  with  $n = O(d)$ .
2. All entries in  $A$  are in  $\{0, +1, -1\}$  and all entries in  $b$  are in  $\{\pm k\tau \mid k \in \mathbb{N}, k \leq O(1)\}$ .
3. There are at most three non-zero entries in each row of  $A$ .

Then, there exists an algorithm that runs in  $T(d)$  time for a 3-SAT formula on  $d$  variables and  $m = O(d)$  clauses which distinguishes between the following cases correctly with probability at least  $2/3$ :

- There is an assignment that satisfies all clauses in  $\phi$ .
- Any assignment can satisfy at most  $(1 - 5\eta)m$  clauses in  $\phi$ .

Combining Theorem F.1 and Theorem F.2 with the Hypothesis 1, we have the following corollary.

**Corollary F.3.** *Under Hypothesis 1, for some constant  $\eta > 0$  and  $C > 0$ , no algorithm can solve Tukey regression with approximation ratio  $1 + \eta$  and success probability  $2/3$ , and runs in  $2^{d/\log^C d}$  time, when the loss function  $M$  satisfies Assumption 4 and the input data satisfies the following restrictions:*

1.  $A \in \mathbb{R}^{n \times d}$  and  $b \in \mathbb{R}^n$  with  $n = O(d)$ .
2. All entries in  $A$  are in  $\{0, +1, -1\}$  and all entries in  $b$  are in  $\{\pm k\tau \mid k \in \mathbb{N}, k \leq O(1)\}$ .
3. There are at most three non-zero entries in each row of  $A$ .

## F.2. Provable Algorithms

In this section, we use the polynomial system verifier to develop provable algorithms for Tukey regression.

**Theorem F.4** ((Renegar, 1992; Basu et al., 1996)). *Given a real polynomial system  $P(x_1, x_2, \dots, x_d)$  with  $d$  variables and  $n$  polynomial constraints  $\{f_i(x_1, x_2, \dots, x_d) \Delta_i 0\}_{i=1}^n$ , where  $\Delta_i$  is any of the “standard relations”:  $\{>, \geq, =, \neq, \leq, <\}$ , let  $D$  denote the maximum degree of all the polynomial constraints and let  $H$  denote the maximum bitsize of the coefficients of all the polynomial constraints. Then there exists an algorithm that runs in*

$$(Dn)^{O(d)} \text{poly}(H)$$

*time that can determine if there exists a solution to the polynomial system  $P$ .*

Besides Assumption 1, we further assume that the loss function  $M(x)$  can be approximated by a polynomial  $P(x)$  with degree  $D$ , when  $|x| \leq \tau$ . Formally, we assume there exist two constants  $L_P \leq 1 \leq U_P$  such that when  $|x| \leq \tau$ , we have

$$L_P P(|x|) \leq M(|x|) \leq U_P P(|x|).$$

Indeed, Assumption 1 already implies we can take  $P(x) = x^p$ , with  $L_P = L_M$  and  $U_P = U_M$  when  $p$  is an integer. However, for some loss function (e.g., the one defined in (1)), one can find a better polynomial to approximate the loss function. Since the approximation ratio of our algorithm depends on  $U_P/L_P$ , for those loss functions we can get an algorithm with better approximation ratio. We also assume Assumption 2 and all entries in  $A$  and  $b$  are integers.

We first show that under Assumption 2 and the assumption that all entries in  $A$  and  $b$  are integers, either  $\|Ax - b\|_M = 0$  for some  $x \in \mathbb{R}^d$ , or  $\|Ax - b\|_M \geq 1/2^{\text{poly}(nd)}$  for all  $x \in \mathbb{R}^d$ .

**Lemma F.5.** *Suppose all entries in  $A$  and  $b$  are integers, under Assumption 1 and Assumption 2, either  $\|Ax - b\|_M = 0$  for some  $x \in \mathbb{R}^d$ , or  $\|Ax - b\|_M \geq 1/2^{\text{poly}(nd)}$  for all  $x \in \mathbb{R}^d$ .*

*Proof.* We show that either there exists  $x \in \mathbb{R}^d$  such that  $Ax = b$ , or  $\|Ax - b\|_2 \geq 1/2^{\text{poly}(nd)}$  for all  $x \in \mathbb{R}^d$ . Notice that  $\|Ax - b\|_2 \geq 1/2^{\text{poly}(nd)}$  implies  $\|Ax - b\|_\infty \geq 1/2^{\text{poly}(nd)}/\sqrt{n}$ , and thus the claimed bound follows from Assumption 1.

Without loss of generality we assume  $A$  is non-singular. By the normal equation, we know  $x^* = (A^T A)^{-1}(A^T b)$  is an optimal solution to  $\min_x \|Ax - b\|_2$ . By Cramer’s rule, all entries in  $x^*$  are either 0 or have absolute value at least  $1/2^{\text{poly}(nd)}$ . This directly implies either  $Ax^* - b = 0$  or  $\|Ax^* - b\|_2 \geq 1/2^{\text{poly}(nd)}$ .  $\square$

Lemma F.5 implies that either  $\|Ax - b\|_M = 0$  for some  $x \in \mathbb{R}^d$ , or  $\|Ax - b\|_M \geq 1/2^{\text{poly}(nd)}$  for all  $x \in \mathbb{R}^d$ . The former case can be solved by simply solving the linear system  $Ax = b$ . Thus we assume  $\|Ax - b\|_M \geq 1/2^{\text{poly}(nd)}$  for all  $x \in \mathbb{R}^d$  in the rest part of this section.



To solve the Tukey regression problem  $\min_x \|Ax - b\|_M$ , we apply a binary search to find the optimal solution value OPT. Since  $1/2^{\text{poly}(nd)} \leq \text{OPT} \leq n \cdot \tau^p \leq 2^{\text{poly}(nd)}$  by Assumption 1 and Assumption 2, the binary search makes at most  $\log(2^{\text{poly}(nd)}/\varepsilon) = \text{poly}(nd) + \log(1/\varepsilon)$  guesses to the value of OPT to find a  $(1 + \varepsilon)$ -approximate solution.

For each guess  $\lambda$ , we need to decide whether there exists  $x \in \mathbb{R}^d$  such that  $\|Ax - b\|_M \leq \lambda$  or not. We use the polynomial system verifier in Theorem F.4 to solve this problem. We first enumerate a set of coordinates  $S \subseteq [n]$ , which are the coordinates with  $|(Ax^* - b)_i| \geq \tau$ , where  $x^* = \text{argmin}_x \|Ax - b\|_M$ , and then solve the following decision problem:

$$\begin{aligned} & \sum_{i \in [n] \setminus S} P(\sigma_i(Ax - b)_i) + |S| \cdot \tau^p \leq \lambda \\ \text{s.t } & \sigma_i^2 = 1, \forall i \in [n] \setminus S \\ & 0 \leq \sigma_i(Ax - b)_i \leq \tau, \forall i \in [n] \setminus S. \end{aligned}$$

Clearly,  $\sigma_i(Ax - b)_i = |(Ax - b)_i|$ , and thus  $L_P P(\sigma_i(Ax - b)_i) \leq M((Ax - b)_i) \leq U_P P(\sigma_i(Ax - b)_i)$ . Thus by Assumption 1, for all  $x \in \mathbb{R}^d$  and  $S \subseteq [n]$ ,

$$L_P \|Ax - b\|_M \leq \sum_{i \in [n] \setminus S} P(\sigma_i(Ax - b)_i) + |S| \cdot \tau^p.$$

Moreover,

$$\sum_{i \in [n] \setminus S} P(\sigma_i(Ax^* - b)_i) + |S| \cdot \tau^p \leq U_P \|Ax^* - b\|_M$$

when  $S = \{i \in [n] \mid |(Ax^* - b)_i| \geq \tau\}$ , which implies the binary search will return a  $((1 + \varepsilon) \cdot U_P/L_P)$ -approximate solution.

Now we analyze the running time of the algorithm. We make at most  $\text{poly}(nd) + \log(1/\varepsilon)$  guesses to the value of OPT. For each guess, we enumerate a set of coordinates  $S$ , which takes  $O(2^n)$  time. For each set  $S \subseteq [n]$ , we need to solve the decision problem mentioned above, which has  $n + d$  variables and  $O(n)$  polynomial constraints with degree at most  $D$ . By Theorem F.4 this decision problem can be solved in  $(nD)^{O(n)}$  time. Thus, the overall time complexity is upper bounded by  $(nD)^{O(n)} \cdot \log(1/\varepsilon)$ .

Notice that we can apply the row sampling algorithm in Theorem D.8 to reduce the size of the problem before applying this algorithm. This reduces the running time from  $(nD)^{O(n)} \cdot \log(1/\varepsilon) = 2^{O(n \cdot (\log n + \log D))} \cdot \log(1/\varepsilon)$  to  $2^{\tilde{O}(\log D \cdot d^{p/2} \text{poly}(d \log n)/\varepsilon^2)}$ . Formally, we have the following theorem.

**Theorem F.6.** *Under Assumption 1 and 2, and suppose all entries in  $A$  and  $b$  are integers, and there exists a polynomial  $P(x)$  with degree  $D$  and two constants  $L_P \leq 1 \leq U_P$  such that when  $|x| \leq \tau$ , we have*

$$L_P P(|x|) \leq M(|x|) \leq U_P P(|x|).$$

*Then there exists an algorithm that returns a  $((1 + \varepsilon) \cdot U_P/L_P)$ -approximate solution to  $\min_x \|Ax - b\|_M$  and runs in  $2^{\tilde{O}(\log D \cdot d^{p/2} \text{poly}(d \log n)/\varepsilon^2)}$  time.*

**Corollary F.7.** *Under Assumption 2, and suppose all entries in  $A$  and  $b$  are integers, for the loss function  $M$  defined in (1) there exists an algorithm that returns a  $(1 + \varepsilon)$ -approximate solution to  $\min_x \|Ax - b\|_M$  and runs in  $2^{\tilde{O}(\text{poly}(d \log n)/\varepsilon^2)}$  time.*
